# Supplementary material for: RNA CoMPASS: A Dual Approach for Pathogen and Host Transcriptome Analysis of RNA-Seq Datasets
Source: PLoS One. 2014 Feb 25;9(2):e89445. doi: 10.1371/journal.pone.0089445 (PMC3934900; doi:10.1371/journal.pone.0089445)
Supplement: Table S2 — Top 250 differentially expressed genes between lymphoblastoid cell line and Burkitt's lymphoma samples. (XLS) [file pone.0089445.s005.xls]

## Sheet: top250clust1
	Clust.ord	logFC	logCPM	PValue	FDR	SRR032238	SRR032241	SRR032243	SRR032244	SRR032245	SRR032246	SRR032250	SRR032251	SRR032254	SRR032255	SRR032252	SRR032256	SRR032263	SRR032264	SRR032266	SRR032267	SRR032269	SRR032270	SRR032271	SRR032273	SRR032276	SRR032278	Akata	SRR387293	SRR387392	SRR387393	SRR387394	SRR387395	SRR387396	SRR387397	SRR387398	SRR387399	SRR387400	SRR387401	SRR387402	SRR387403	SRR387404	SRR387405	SRR387406	SRR387407	SRR387418	SRR387431	SRR387434	SRR387435
ATR	250	1.802	6.11429	3.58649e-31	1.31708e-29	36.1311	37.6286	40.568	18.6473	41.6846	16.3536	36.5631	19.3788	23.6334	29.385	29.3739	43.9342	39.7383	36.0496	30.8007	29.1667	47.9173	39.7704	35.226	22.9428	23.4672	29.0809	62.8293	112.117	45.3848	61.6372	185.755	112.248	74.7961	77.2065	76.7294	144.976	128.877	136.285	74.5807	156.06	132.889	136.853	44.0798	112.289	125.677	83.9823	118.959	110.641
HIRA	249	1.88324	6.14726	1.16279e-43	1.12752e-41	20.9863	21.2683	35.9926	19.0317	35.7297	21.5267	30.909	26.9619	29.2848	27.9664	24.0479	25.8436	35.7645	38.6714	17.002	36.5403	33.2154	29.6877	33.8646	28.3309	23.1738	26.785	45.4377	185.104	119.714	77.5103	112.187	125.462	159.772	201.223	174.585	138.582	125.195	103.195	118.103	96.2868	92.2422	89.2165	57.2297	106.425	104.898	81.1485	69.749	106.836
RP11-298C3.2	248	1.73758	5.89172	3.41196e-35	1.69226e-33	15.3611	23.5179	18.6064	17.4938	34.1984	29.8704	34.3015	19.098	27.3582	26.9532	26.4688	26.7666	23.684	25.5624	13.0595	42.1114	32.6709	40.5172	34.7155	39.2808	22.0005	21.428	120.018	72.4318	50.0159	35.8691	57.3486	47.6938	73.6159	81.006	90.25	98.1729	95.7376	105.715	67.5579	74.6714	88.0426	107.322	137.981	127.29	102.217	121.079	107.074	115.144
SNRNP40	247	1.4736	6.05203	1.99834e-36	1.08463e-34	27.477	24.3359	33.8575	22.6843	42.0249	34.8766	33.7361	29.4896	40.2024	36.2753	35.1841	33.9659	32.2675	27.0918	34.7432	49.8127	39.931	34.9158	37.0979	30.5904	26.9872	31.3768	51.4699	105.179	81.0443	55.4529	117.014	63.1867	91.9092	89.669	81.4616	97.0854	85.3672	90.4858	71.7122	77.8154	98.8417	120.932	157.891	121.672	133.854	141.43	115.101	94.6464
EIF5AL1	246	1.69733	6.01565	3.93521e-38	2.53439e-36	21.2027	20.2458	32.6374	22.6843	32.497	31.2054	28.4589	24.7151	32.3674	27.9664	22.9181	22.8901	20.8229	27.3103	20.4516	53.0899	38.116	41.6375	34.8857	31.6332	20.8271	29.0809	153.548	145.696	134.765	43.0842	128.214	53.1619	129.234	101.524	92.2781	120.095	90.9281	97.0073	66.3215	109.006	61.7948	71.0486	94.1789	81.8556	86.5999	106.91	104.05	107.38
HSPD1P1	245	2.20054	5.96857	7.90924e-38	4.87548e-36	23.5826	24.1314	10.9808	19.224	36.07	22.1942	26.7627	11.515	15.9268	21.2788	11.7818	23.6285	15.7364	14.4198	8.87059	38.6704	17.0614	45.7452	35.0559	20.5095	7.62683	15.3057	232.829	113.227	35.1964	107.607	180.735	81.2617	113.743	120.825	104.447	127.62	109.865	120.574	81.0101	121.225	70.644	79.5394	93.3455	60.6818	72.8592	94.5445	90.705	74.7699
PRKRIR	244	2.54279	5.92726	7.82142e-59	1.56974e-56	15.7938	17.1783	16.1662	15.3792	24.5004	11.5143	20.9201	9.82985	10.7891	25.7372	15.6553	32.6737	13.511	18.571	18.7268	22.1208	12.3423	28.9409	22.9735	21.0309	16.7204	10.714	239.488	62.7187	63.9092	105.752	106.587	71.2369	68.6	89.061	99.2074	122.227	144.959	129.43	104.552	127.049	104.166	103.951	46.7653	86.6706	90.5545	74.4506	106.969	112.582
CREG1	243	2.08239	6.01524	2.69309e-35	1.34343e-33	28.9914	34.152	9.76071	33.6419	37.7714	28.0348	17.1507	15.4469	18.881	22.6974	13.88	27.1358	23.2072	25.7809	15.7699	16.0581	27.2257	39.0235	32.3331	42.4094	9.38687	17.6016	178.852	89.9154	51.1737	82.8701	79.3612	114.374	66.6821	190.129	161.233	76.0764	79.8815	161.37	148.321	124.798	70.569	101.266	97.6979	88.8312	69.7089	80.6333	85.5963	47.2844
THOC3	242	2.83825	6.08207	5.28536e-83	2.17203e-80	14.4957	17.3828	13.726	15.3792	11.7398	22.3611	12.0621	10.9533	20.037	11.146	15.6553	9.59906	13.511	23.1591	11.3346	15.8942	16.3354	23.5261	27.9085	27.4618	14.9603	13.7752	39.4054	115.169	110.683	68.0277	95.581	73.2115	115.366	104.107	105.799	127.62	170.133	128.133	135.363	144.877	162.136	129.673	125.757	96.6711	165.424	139.112	112.495	102.178
MSTO1	241	2.43316	6.26777	4.54947e-70	1.35386e-67	24.448	19.0188	28.0621	18.2628	30.115	16.3536	37.8824	26.681	19.9085	19.0496	17.5921	19.1981	27.6578	25.5624	18.7268	25.2341	29.5853	23.5261	30.291	16.338	23.4672	19.8975	43.0091	163.457	98.1794	70.2953	142.503	107.235	112.268	149.702	169.008	106.22	134.363	147.549	128.043	73.0279	247.404	144.22	101.587	155.501	184.527	106.395	132.096	111.961
RP11-642N14.1	240	3.10028	6.05642	1.04215e-95	5.99583e-93	11.6831	15.5422	13.421	12.1111	14.6322	9.34492	19.9778	9.549	10.0185	16.4151	12.4274	16.7984	11.7625	15.0753	11.5811	15.5665	15.2464	13.4435	18.3788	11.1238	11.4402	12.2446	86.0182	75.6233	69.4666	88.6421	112.766	64.8575	87.6309	87.8452	101.405	106.307	93.1074	122.5	76.9052	104.218	115.04	139.912	109.273	144.76	163.749	169.51	346.347	124.228
PA2G4P4	239	1.46043	6.3054	1.85227e-32	7.46967e-31	29.8569	32.925	61.0045	30.7584	50.532	45.7234	39.0132	37.6343	39.8171	32.0195	35.3455	39.1346	45.1427	36.4866	29.0758	58.4972	47.1912	48.1725	43.7347	37.7166	65.7081	39.7949	194.128	98.3796	77.3394	90.9097	127.055	78.9834	120.382	119.913	102.926	152.414	140.3	126.317	83.8291	121.904	83.243	96.3339	111.403	94.4487	117.232	137.051	146.796	110.486
SYNC	238	1.56096	6.459	2.46856e-30	8.68632e-29	37.2129	32.7205	89.0665	39.2169	45.2576	31.3722	44.4788	33.7023	39.5602	37.6939	37.4437	57.0406	52.9314	51.3434	44.8458	39.3258	54.8144	49.4795	39.8207	34.9356	63.948	56.6312	203.529	73.5419	81.0443	114.616	118.559	85.3628	89.4013	90.8848	95.6583	155.241	151.497	121.982	132.841	100.646	143.163	158.829	119.275	158.094	144.244	167.965	189.229	138.98
RP11-111F10.2	237	2.0746	6.31047	2.4809e-61	6.11719e-59	27.477	28.426	20.4365	27.6825	35.2193	26.5329	30.3436	26.9619	31.3399	33.0328	27.5986	46.7031	17.6438	18.7895	31.5399	42.2753	28.6777	38.8368	30.291	29.8952	36.9608	22.1933	183.709	105.456	112.073	141.621	123.966	96.6027	99.7281	90.4289	104.954	149.369	128.351	129.318	113.553	123.369	146.388	148.965	69.0831	115.746	150.879	114.123	203.617	132.691
RP3-417G15.1	236	3.25427	5.903	3.70969e-50	5.42621e-48	12.3322	8.18013	17.6913	11.7266	6.12509	8.51056	7.91572	8.42559	9.1194	10.5381	10.0065	11.9988	13.3521	12.672	24.6405	7.53745	15.6094	7.2819	8.16836	10.2547	16.427	23.7239	187.548	39.1298	104.431	92.1466	52.1351	42.8333	38.652	42.0988	55.6035	87.7771	43.8108	87.9662	91.3466	96.6083	90.1424	94.9603	189.84	105.128	98.3297	182.649	214.043	195.97
RPL35P5	235	4.44696	6.12755	1.63028e-98	1.00495e-95	3.02896	4.49907	9.15067	6.53615	3.06254	7.50931	2.63857	3.93194	8.34874	4.45842	5.00325	6.6455	8.42452	7.64689	8.62419	2.78558	5.80815	3.73431	4.42453	5.38808	8.21351	4.59172	73.797	69.6566	104.2	239.128	94.2293	63.3386	73.9109	76.5986	83.9967	96.9985	56.3604	87.2621	89.9123	113.007	117.965	137.29	317.912	131.426	135.329	229.019	121.983	259.327
CTC-788C1.1	234	2.25279	6.13488	1.91883e-36	1.04807e-34	24.2317	16.5648	30.8073	28.6437	18.7156	17.5217	11.3082	21.6257	20.8076	16.0098	15.0097	27.1358	30.8369	24.47	51.0059	15.2388	26.8627	16.4309	12.7631	14.2523	29.9206	35.2032	107.327	74.5132	127.355	228.82	72.0236	67.8953	87.1884	108.515	93.6302	79.5561	43.5102	83.5567	86.846	85.8899	77.1685	100.704	221.325	115.746	100.676	208.925	100.818	176.559
RP11-3P17.3	233	2.13228	6.08854	4.87711e-36	2.56643e-34	29.4242	17.5873	24.7068	32.4885	22.7989	25.031	12.2505	27.2427	34.4225	19.8602	27.7599	29.5356	32.2675	17.4786	55.4412	15.8942	19.784	16.0575	14.4648	9.03807	21.7071	31.3768	107.17	62.7187	181.771	199.548	78.2026	77.0088	68.0099	91.1888	79.4335	86.5157	53.6551	112.644	104.304	132.765	97.4918	103.451	126.405	84.7569	113.612	148.644	88.4113	163.205
AL049757.3	232	2.05576	6.22104	7.09749e-45	7.46968e-43	41.3236	20.2458	20.4365	36.7178	27.0525	29.5366	19.9778	20.7831	31.9821	27.3585	22.1111	35.0735	28.4526	24.0331	46.3242	24.4148	31.5818	23.7128	21.1016	21.5523	14.9603	35.9685	184.101	78.8147	119.251	263.247	86.8918	104.957	89.2537	120.977	123.545	107.09	74.4709	107.901	121.021	163.562	95.9169	99.0185	86.2149	73.5219	97.5254	167.965	122.087	135.331
RP11-122C9.1	231	3.01423	6.40037	2.88401e-67	8.02872e-65	24.8807	15.9513	25.9269	24.2222	15.9933	15.5192	10.3658	16.2895	18.3672	15.8071	12.266	26.2128	23.684	19.4449	32.0327	13.1086	20.6915	13.6302	9.8701	11.2976	14.0803	26.785	155.977	75.207	199.137	255.413	105.815	83.0844	95.4499	101.372	117.46	128.012	77.9277	125.205	133.533	237.162	115.265	117.811	223.455	111.98	121.521	224.125	148.464	213.595
MRPL20	230	2.53522	5.6516	1.75825e-59	3.7009e-57	9.95229	8.99814	21.9616	8.07407	18.035	15.853	12.0621	13.4809	21.5783	11.146	12.9116	14.7678	19.7102	11.7981	13.5523	15.5665	17.969	13.0701	13.6139	12.3404	16.427	16.8363	18.3317	79.5085	44.227	43.2903	92.8777	60.1489	97.8103	88.3011	89.067	97.3464	80.7081	103.307	54.8475	91.3563	78.5184	83.2854	145.852	95.1278	101.279	121.079	99.0456	91.1525
GTF2A2	229	2.133	5.65303	3.94609e-53	6.42543e-51	14.063	16.9738	32.9424	17.6861	23.4795	13.3499	16.0199	18.5363	19.0094	14.3885	20.9814	19.7519	27.022	17.9156	16.5092	16.2219	25.0477	16.9911	18.2086	14.4261	23.4672	18.3669	44.6543	99.7672	28.9444	58.7512	67.0032	57.2629	64.0266	61.7044	71.1522	104.088	80.4075	88.8184	67.1622	81.5311	90.0674	98.6439	91.0304	111.61	107.043	99.4392	94.354	96.6651
AC121253.1	228	3.01933	5.72558	1.6351e-78	6.41406e-76	6.05791	10.2252	12.8109	8.26631	13.4412	5.6737	16.3969	10.3916	11.1745	12.9699	15.9781	16.7984	10.014	9.39474	6.40654	11.7978	16.3354	14.3771	14.9753	16.1642	16.1337	14.5404	111.792	66.8815	98.6425	63.4925	45.5699	41.0106	103.859	45.8984	70.6451	168.464	101.599	124.687	86.6976	111.971	85.8678	89.6535	73.4355	85.1273	101.279	91.4531	143.043	104.818
PPP1R14BP3	227	1.60081	5.65712	9.16628e-34	4.07758e-32	20.77	19.8368	35.6876	18.455	25.8615	31.0385	19.6008	22.7491	23.6334	21.0762	22.5953	19.5673	30.519	20.5373	28.8294	28.1835	33.7599	18.6715	22.6332	24.6809	22.0005	32.142	60.9491	62.4412	83.3599	52.773	77.8164	37.3652	57.0929	59.8806	71.4902	85.2977	77.8525	63.1029	56.9247	99.931	59.395	61.1217	115.663	75.8059	69.3737	130.353	74.5449	107.69
RP11-42D20.2	226	2.20874	5.78595	4.11814e-37	2.38521e-35	16.6593	16.7693	21.0465	22.492	14.462	19.3573	13.0044	17.9746	22.0921	19.2523	22.9181	21.7825	23.0482	15.5123	40.9033	13.1086	18.5135	14.0036	13.2736	13.3833	22.8805	32.9073	67.9215	43.2926	82.8968	127.397	56.3831	56.6554	50.3066	48.938	79.6025	66.159	46.8167	76.5165	86.4998	137.195	69.6691	73.1088	153.724	80.0036	83.9858	146.583	123.651	134.943
DDX12	225	2.81769	5.53495	2.85953e-40	2.09133e-38	7.35604	7.56662	10.3708	18.2628	8.67721	6.00745	18.6585	14.0426	7.3212	14.7938	9.19952	12.1834	10.8088	20.5373	11.3346	11.6339	7.07868	9.89591	16.5069	10.95	11.7336	9.94873	24.9124	51.8956	52.3315	27.4172	32.8258	45.1117	38.2094	50.3058	65.5749	38.3209	44.7877	49.2077	59.3975	44.1955	184.109	176.31	185.209	145.624	114.081	111.547	104.988	94.1029
RP11-411G7.1	224	3.42314	5.56105	3.84381e-74	1.32688e-71	20.1209	2.65854	2.7452	10.5732	10.889	10.6799	4.52327	6.45962	8.47718	5.47169	5.16464	6.6455	5.56336	7.86537	13.5523	4.91573	5.80815	7.09518	3.57366	3.8238	2.05338	3.82643	96.3592	109.342	70.8559	168.214	65.4585	72.7558	88.9587	123.865	145.515	49.8476	47.4179	63.2882	77.9932	72.3133	77.5435	76.73	79.5474	70.2501	76.1435	96.0902	82.9898	77.2545
AC090602.1	223	2.3779	5.75028	1.01806e-48	1.39458e-46	20.1209	13.0882	21.3516	18.6473	15.9933	14.8518	10.3658	14.0426	24.404	11.754	13.2344	20.8595	21.6176	16.1677	37.4536	10.6507	15.7909	12.8834	9.35957	7.6476	15.2537	19.8975	110.147	69.6566	109.062	180.583	48.6594	82.6288	75.3862	94.6843	101.912	80.2521	52.1522	81.8152	101.881	121.689	69.9691	80.4759	75.0098	63.6449	69.9099	132.929	75.0662	85.3293
RP11-65F13.1	222	4.70868	5.27578	4.15515e-161	1.79295e-157	2.16354	3.06755	2.7452	2.8836	3.40283	2.16936	2.26163	1.12341	2.56884	2.22921	2.58232	2.39976	2.06639	2.62179	4.18889	2.45787	2.54107	5.60146	2.89296	2.25952	2.34672	4.59172	139.368	63.69	80.8128	108.638	78.0095	79.1353	80.9922	68.3916	73.0113	94.6496	63.6497	67.3642	78.5373	83.8535	55.3453	71.1734	27.411	45.249	52.8179	59.5089	66.3085	70.5772
RP11-40H20.2	221	2.67859	5.35461	1.15673e-70	3.56521e-68	11.8995	15.1332	7.62556	10.1887	11.5696	8.67743	8.85807	5.89791	11.3029	10.1328	8.39254	15.8754	7.31184	6.99144	17.4948	13.2725	10.5273	16.0575	14.2946	7.6476	4.69343	9.94873	108.737	50.6468	72.0137	90.9097	69.5134	62.731	58.4206	55.4732	59.3216	91.7788	60.5687	57.4707	72.6519	85.4255	56.3952	64.3058	32.5968	52.7184	62.4028	69.8135	130.219	71.0431
RBL1	220	1.90088	5.43086	5.7918e-31	2.10014e-29	13.1976	19.8368	24.0968	14.6102	31.9866	11.0137	27.8935	9.26815	10.2754	14.1859	16.3009	17.9059	19.3923	23.1591	8.13138	20.9738	21.7806	33.9822	33.3541	18.7714	13.787	16.8363	94.7924	37.6035	25.2395	50.2993	39.7771	55.5921	51.6344	73.7109	58.1386	80.3391	98.3677	112.496	78.4878	68.9549	74.7687	88.9668	46.7653	59.5706	60.7271	62.0851	76.3173	76.6333
HSDL1	219	1.62284	5.43577	6.02357e-31	2.17504e-29	21.4191	19.6323	21.3516	25.1834	17.5246	15.3524	25.2549	18.2554	16.1837	31.0063	23.0795	22.3363	20.8229	21.4113	26.119	22.9401	14.1574	23.7128	18.2086	23.638	17.6004	11.4793	73.0136	125.16	67.6141	63.9048	40.9357	97.8179	48.0937	34.8037	43.4349	42.9316	117.455	76.5535	64.8872	69.7052	67.1193	64.2434	36.9493	69.0772	54.8287	47.9163	53.3804	56.1357
IKBKAP	218	2.18613	5.51282	5.95505e-60	1.42756e-57	18.1737	12.6792	17.6913	12.8801	19.226	11.0137	13.9467	9.549	15.1562	15.4018	12.266	23.6285	24.1609	14.8568	26.119	15.4026	18.8765	17.738	14.8051	12.6881	14.0803	10.714	33.6082	48.4266	59.5097	63.4925	93.8431	75.4899	78.3367	86.4774	87.2079	86.2112	99.5701	87.7438	63.0079	62.8097	93.9671	90.59	39.4496	63.2128	95.2464	64.146	81.2174	67.7044
AL391261.1	217	1.96102	5.57927	1.08184e-63	2.9176e-61	17.5247	15.3377	11.5908	26.5291	21.0975	23.6961	17.5277	13.7618	20.6792	18.4416	17.9149	24.736	19.2333	16.3862	20.4516	22.6124	15.7909	13.4435	14.4648	17.0333	16.427	18.3669	77.1657	74.9295	104.894	69.6768	102.339	65.3132	87.926	70.0634	79.0955	77.8597	58.1639	70.9584	51.6328	90.8204	62.2447	75.4189	54.8219	71.9786	75.0711	73.4201	83.5111	78.5744
CTD-2197O4.1	216	1.96362	5.25394	2.35175e-37	1.3997e-35	14.7121	18.2008	9.76071	12.6878	16.3336	15.853	16.3969	9.549	16.8259	15.1992	12.1046	20.3057	8.26556	13.9829	8.62419	20.1545	16.8799	21.2855	18.7191	15.2952	4.40009	13.7752	87.7417	67.9915	94.0114	56.8959	71.4444	70.3256	80.4021	84.5016	68.279	68.1599	67.7828	68.661	63.2057	60.7732	58.72	61.9958	13.0573	40.4339	49.1984	36.066	44.2056	40.2189
HECA	215	2.28627	5.67473	6.4161e-38	4.04168e-36	37.6456	23.1089	7.32053	29.2204	19.3961	8.67743	20.5432	9.549	12.202	18.8469	17.7535	19.1981	11.4446	22.2852	14.0451	10.323	21.9621	29.8744	10.8911	7.29998	10.8536	8.41815	120.645	62.3025	66.9194	121.625	81.8714	149.157	78.0417	72.1911	42.2519	32.7968	75.8235	82.4822	127.895	95.3936	105.891	82.9108	46.7653	98.4613	77.0149	49.2044	76.213	79.5061
RP11-488C13.1	214	2.70675	5.11909	1.16516e-53	1.97164e-51	14.2794	7.56662	11.5908	10.9577	7.99664	8.00993	7.53878	6.45962	9.1194	8.30887	6.77859	9.04527	10.014	10.9241	18.9732	6.22659	6.53417	6.72175	6.80696	8.69045	11.7336	12.2446	80.8477	22.3401	54.1839	107.195	31.4741	41.1625	38.9471	41.7949	46.3081	48.2817	28.4808	48.059	49.0611	91.7136	62.3947	67.9269	87.2336	48.3355	49.6005	57.1904	80.6961	79.739
RP11-392P7.1	213	2.1438	5.27352	1.61455e-34	7.78411e-33	11.4668	14.1107	11.8959	15.5714	5.10424	12.6824	8.29266	8.14473	14.1286	19.8602	10.6521	17.9059	15.8953	17.6971	37.4536	12.1255	15.0649	11.0162	6.63679	8.86426	19.0671	13.0099	46.1427	40.3787	72.9399	114.204	49.0456	50.7316	44.7006	56.3851	57.1245	42.4966	30.6601	45.984	68.4481	72.2062	86.6927	98.956	86.6779	62.7806	63.8104	55.6447	57.7593	66.5398
RP11-231D20.1	212	3.59833	4.8953	1.44386e-95	7.78779e-93	7.35604	2.45404	6.40547	5.19047	3.40283	5.50683	4.52327	5.89791	3.98171	2.63452	2.90511	3.69195	6.04022	4.15117	9.85622	3.60487	4.35611	3.54759	2.72279	3.30237	3.52008	6.12229	41.599	35.3834	69.6981	61.4311	31.281	39.3398	31.2757	55.1692	49.5192	41.5397	28.8565	45.9469	52.1274	72.7421	62.6947	62.9947	52.1364	49.9405	73.9316	64.146	53.9017	93.87
HNRNPA1P7	211	3.92392	4.78847	1.46338e-132	4.20965e-129	4.54344	2.24954	2.44018	3.07584	4.59382	1.50186	4.52327	3.08938	3.3395	2.02655	2.74372	4.61493	2.54325	1.52938	1.97124	2.62172	4.17461	3.17416	3.914	1.73809	2.64006	3.06115	55.2303	41.6275	80.8128	82.0455	47.3078	44.656	47.3561	49.6979	56.2795	39.0169	33.4405	44.9835	50.4953	47.6968	48.0709	43.703	35.5602	38.582	40.8199	75.2234	62.4509	54.2722
AP000304.12	210	3.18883	4.81534	2.76706e-69	7.9599e-67	4.54344	6.3396	1.83013	5.95943	7.65636	6.3412	7.35031	1.40426	4.75236	5.06638	4.03488	5.90711	4.92755	3.27724	5.42092	6.55431	3.63009	10.6428	8.5087	4.86665	1.76004	1.53057	9.47924	38.5748	43.0693	47.4132	59.8588	58.1743	60.6335	34.1958	42.9279	59.7215	35.8452	45.1688	43.7197	74.1712	39.8966	46.5749	72.3242	50.3109	53.019	63.8884	51.3995	55.204
AC084031.1	209	2.0128	4.95707	1.11639e-40	8.30558e-39	11.2504	9.40715	17.3863	10.1887	13.4412	15.3524	10.3658	15.4469	15.5415	8.30887	12.1046	14.0294	16.5311	8.7393	9.60981	13.4363	15.6094	8.02876	10.721	9.73331	8.21351	15.3057	96.3592	39.1298	43.0693	31.7463	43.4459	23.5431	30.5381	33.8918	47.3221	56.2852	45.5392	50.097	34.867	57.8078	30.8974	37.8967	63.9898	46.1749	49.8016	65.9493	98.5244	44.7998
AC011533.1	208	2.28483	4.69656	8.79721e-75	3.30087e-72	9.30323	6.95311	9.45569	8.65079	9.69806	7.50931	8.29266	8.98729	8.09186	8.30887	8.55394	9.96825	9.53719	8.52081	10.1026	9.33989	9.61975	9.52248	7.48766	7.82141	6.74681	9.18344	55.5436	28.723	37.7435	30.3032	35.336	28.4036	32.751	27.6606	31.2664	46.3679	32.3885	48.1702	34.7186	41.1586	54.3704	39.7073	61.3043	42.1007	41.155	57.9632	56.5081	48.2161
RP4-680D5.3	207	1.98606	4.83707	5.44918e-51	8.39758e-49	5.84156	11.2477	6.10045	9.03527	10.2085	13.3499	11.6851	11.515	11.4314	10.7407	12.5888	11.8142	9.21928	9.61323	6.89935	10.8146	8.34922	10.6428	12.0824	14.7738	7.92017	13.0099	55.1519	66.3264	51.8684	41.0228	62.9483	51.1873	57.5355	56.3851	66.927	48.7602	46.2907	41.167	35.6583	47.6968	21.9731	27.3456	45.7467	31.3595	29.1571	51.2653	31.5903	39.986
RP11-111K18.1	206	1.80439	5.01326	3.16941e-46	3.64693e-44	10.6013	14.5197	17.6913	10.5732	12.5905	11.6812	16.5853	10.3916	15.9268	9.32215	14.0414	16.2446	26.3862	14.4198	4.92811	11.9616	12.5238	12.3232	13.9543	18.0761	10.2669	14.5404	25.5391	59.8048	33.3439	48.2378	66.617	47.9976	48.6839	48.1781	57.8006	46.0199	56.5107	49.8376	44.511	50.0548	50.3208	55.3779	45.1911	46.3601	48.5281	44.5673	53.6932	51.0889
RP11-312J18.5	205	1.4888	5.03452	1.64859e-39	1.15669e-37	17.741	20.0413	11.2858	17.1093	17.1843	19.858	11.1197	14.6043	19.2663	15.8071	17.5921	18.8289	16.2132	20.7558	19.7124	16.8773	19.2395	16.4309	17.1876	14.4261	11.4402	19.1322	59.539	57.5847	39.5959	33.1893	48.6594	34.1755	45.5858	39.8191	47.8291	46.4549	54.5569	56.0256	45.7475	46.1962	45.5962	50.0711	29.6335	48.0269	50.0697	55.1295	46.0823	52.0982
AC068492.3	204	1.559	5.15459	3.31708e-30	1.15429e-28	19.6882	18.4053	12.8109	17.3016	20.7572	24.5304	19.7893	12.6384	19.2663	21.0762	14.8483	26.0282	12.5573	13.1089	15.2771	25.0702	16.3354	23.1527	21.1016	15.6428	6.74681	14.5404	87.82	51.063	50.2475	48.2378	50.5903	40.0993	46.766	41.3389	42.9279	62.9403	59.4415	62.8436	44.1154	53.7348	66.3694	61.6212	19.91	44.7551	61.7996	39.1574	67.351	61.7259
FEZ2	203	1.87074	5.19764	1.46969e-37	8.86952e-36	14.2794	17.7918	27.452	13.649	13.4412	10.513	12.6275	11.7958	13.2295	14.7938	19.6902	25.1052	22.2534	14.6383	17.4948	11.9616	14.7019	16.2442	12.2525	10.7762	25.8139	15.3057	55.0736	66.3264	29.6391	40.1982	58.5071	53.4657	46.766	42.7067	31.0974	60.1564	77.2513	53.6912	54.8475	44.5885	63.4446	79.7892	37.0419	90.0658	63.6764	47.4011	66.8297	59.8625
C12orf41	202	1.75268	5.02663	2.2976e-39	1.59906e-37	13.414	13.7017	22.5716	17.8783	14.1217	13.0161	15.0776	15.1661	14.7709	14.1859	13.3958	15.8754	18.9154	16.3862	18.9732	13.2725	17.243	13.2568	14.2946	8.86426	16.1337	16.071	33.7649	40.3787	27.3235	28.8602	36.8807	34.1755	34.5213	41.4909	38.8717	61.6353	52.9788	47.8738	43.423	44.9457	59.695	69.4877	70.0091	67.8426	60.392	62.8579	55.5698	54.117
GFM2	201	1.89753	5.2404	8.71647e-47	1.07462e-44	15.1448	15.5422	24.7068	14.9947	14.6322	10.0124	12.6275	12.0767	14.514	15.1992	13.88	22.1517	22.7303	14.4198	17.7412	11.9616	18.5135	13.6302	12.5929	11.1238	14.0803	16.8363	27.4193	58.6947	42.6062	51.7423	74.1477	65.3132	99.2856	87.2373	68.11	64.8541	66.0544	63.4735	55.8366	46.4463	67.1193	50.5082	36.8566	65.7437	62.805	53.8414	39.097	56.3686
PDCD10	200	1.80529	5.2398	3.0032e-32	1.19436e-30	12.3322	16.3603	18.9114	18.455	15.4829	12.8493	17.1507	9.26815	13.8718	19.8602	15.3325	28.9818	23.684	17.2601	27.5974	11.9616	14.8834	16.0575	19.57	17.2071	10.5602	10.714	31.3363	56.1971	16.2089	57.102	55.6107	71.8445	29.6529	34.4998	67.434	68.0294	59.4415	70.2173	60.7329	48.59	67.7193	69.3004	40.5608	58.5829	89.0129	73.4201	63.8062	88.9009
RP11-393N4.2	199	2.40832	6.86895	4.13851e-40	2.97628e-38	38.511	32.516	38.4328	38.6402	22.4587	32.5404	20.9201	38.4768	27.1013	29.7903	30.9878	28.6126	34.1749	34.9572	78.6033	25.8895	39.3865	27.6339	22.6332	32.3285	51.9211	35.9685	100.511	137.093	170.656	359.928	123.966	122.88	104.744	193.168	160.557	117.747	81.7602	118.054	116.124	176.889	116.09	151.899	510.159	191.367	184.997	300.121	245.112	329.516
CTD-2124B20.1	198	2.55229	6.87974	4.05338e-54	7.13892e-52	34.1839	24.1314	46.6684	34.9876	27.2226	22.8617	24.1241	39.6003	36.7345	26.7505	35.8297	37.1041	36.2413	35.1757	60.6157	24.5787	33.3969	24.273	23.3138	23.8118	45.4676	58.9271	195.069	132.237	184.086	197.693	127.441	116.349	114.923	152.437	129.967	149.064	102.351	150.513	169.191	205.829	149.387	171.066	356.25	210.38	199.139	365.555	332.585	331.767
RPS15AP1	197	2.22145	6.67132	7.1546e-44	7.09703e-42	50.8432	40.6962	20.7415	44.2151	33.5179	28.5354	23.1818	34.2641	36.3491	30.3983	30.8265	29.7202	39.7383	31.8984	75.1536	24.4148	38.6605	30.6213	23.1437	31.6332	21.7071	42.0908	138.742	104.346	171.351	277.058	92.1053	108.754	109.76	116.722	108.503	105.437	84.1649	126.651	129.033	179.354	179.385	189.609	272.35	170.44	171.993	248.856	185.372	290.85
SNHG6	196	2.35145	6.87037	5.26212e-38	3.36386e-36	30.5059	25.9719	61.3095	41.1393	29.6046	27.3673	26.1973	39.6003	33.0096	33.6408	32.4404	49.1029	51.9777	47.4107	62.587	21.1376	34.3044	24.0863	22.463	19.988	69.8148	45.9172	38.0736	114.337	165.794	272.317	136.324	195.94	134.102	189.065	197.063	163.418	98.7434	124.168	191.051	267.817	141.138	221.387	313.837	182.231	163.347	375.087	292.967	234.481
RPS3AP6	195	6.01174	6.6767	3.63667e-194	3.13844e-190	3.67802	2.24954	2.13516	3.07584	2.55212	3.83809	1.50776	3.93194	3.08261	3.03983	5.64883	2.39976	3.17906	2.84027	2.46405	2.78558	4.17461	2.80073	1.19122	2.08571	1.76004	3.06115	177.755	107.121	238.039	262.216	116.435	109.362	87.3359	136.631	174.416	151.457	107.235	118.721	148.172	221.692	160.636	170.567	363.566	200.565	199.542	286.982	330.917	322.528
CTB-161M19.3	194	3.78648	6.67693	5.36656e-113	5.14593e-110	10.385	6.95311	13.116	14.418	16.1634	10.8468	9.80042	9.26815	14.8993	13.7806	15.6553	19.3827	8.58347	9.17626	19.466	15.4026	15.0649	12.5099	11.5718	8.16902	26.6939	11.4793	169.451	186.075	259.11	139.56	108.518	169.51	156.969	72.1911	177.965	173.118	137.97	149.587	138.083	146.342	230.531	242.739	129.832	199.392	272.468	203.515	465.202	216.157
HDGF	193	2.84419	6.62785	6.49257e-71	2.07522e-68	16.6593	16.3603	35.0776	20.3774	22.4587	23.8629	17.5277	26.4002	23.5049	20.2655	21.9497	24.736	31.1548	25.5624	22.9157	22.6124	25.9552	14.9372	18.3788	13.7309	38.7208	27.5503	29.0644	175.807	192.422	166.565	121.649	142.626	154.756	341.654	260.61	191.431	167.954	112.904	181.012	144.412	230.906	171.191	140.203	147.414	222.063	120.821	222.801	156.683
CPSF1	192	2.02145	7.16951	7.46285e-35	3.63866e-33	45.8671	36.1971	75.3405	35.7566	46.1083	46.8915	59.7449	56.1706	46.753	49.8532	52.6148	50.5797	63.2634	56.3685	25.8726	48.8296	65.1602	41.4508	51.0522	52.8379	72.1615	35.9685	21.2304	215.214	174.824	209.237	179.383	241.355	239.879	677.989	383.647	151.109	141.803	152.514	191.002	134.373	211.182	224.446	383.105	266.37	216.299	250.144	224.156	260.258
RPS10	191	3.80766	7.05413	3.56879e-108	3.07987e-105	11.6831	15.1332	10.6758	10.7654	23.3094	16.0199	15.266	17.4129	17.5966	11.146	13.5572	10.7066	12.3983	16.1677	8.62419	19.9906	22.1436	18.6715	17.3578	17.0333	11.7336	16.8363	100.12	220.764	423.051	332.305	224.76	245.76	268.794	397.127	225.118	144.106	68.4591	148.957	266.77	264.351	184.334	136.79	539.329	184.7	238.753	272.556	172.444	260.181
RP11-408P14.1	190	3.41543	7.1519	9.55848e-130	1.64979e-126	33.1022	21.8819	24.0968	33.2575	32.3269	17.5217	17.7161	30.0513	19.5232	18.6443	20.4972	17.9059	27.181	34.0833	24.1477	19.3352	22.8696	17.3645	17.3578	26.5928	20.2404	26.0197	205.488	212.161	275.782	361.371	164.901	166.169	164.197	232.835	197.908	195.911	138.947	209.8	251.438	286.645	270.502	231.876	345.786	284.704	269.787	328.716	340.926	384.797
CCT8	189	3.70609	7.31282	1.05238e-91	5.34236e-89	13.1976	16.1558	32.6374	22.8765	21.0975	14.8518	17.9046	19.3788	22.0921	18.0363	17.1079	24.3668	29.8832	24.0331	33.0183	18.0243	21.7806	18.2981	21.6121	17.0333	47.521	28.3156	23.6589	241.301	189.875	434.553	319.376	291.175	319.838	283.597	278.017	443.235	240.621	299.656	215.631	285.645	247.479	321.467	303.188	259.827	324.481	335.929	282.436	379.362
INTS10	188	1.64699	6.78345	9.77421e-39	6.53887e-37	48.0306	47.4448	57.3442	46.9065	72.4802	43.2203	51.2637	42.6896	46.4961	49.0426	44.8678	57.7789	52.9314	46.0998	57.6589	63.2491	51.9104	69.8315	66.1977	44.3213	70.9882	24.4892	153.783	192.735	82.4336	146.775	248.511	189.56	138.97	78.2704	165.289	207.698	216.424	202.463	190.458	115.901	154.262	170.691	105.569	161.612	157.783	155.342	182.765	235.49
TMEM48	187	2.29505	6.8738	7.76111e-52	1.24034e-49	28.5587	44.9907	26.842	39.4091	68.0566	40.884	46.7405	20.5023	22.3489	45.8001	33.7316	60.7325	36.5592	42.8226	35.236	53.5815	45.5577	68.7112	50.5417	35.1094	18.1871	21.428	328.405	190.654	129.671	184.912	198.886	214.774	175.409	120.521	167.993	261.461	299.236	294.505	208.163	252.525	155.987	182.117	102.513	134.204	149.204	142.203	133.764	196.824
PPPDE1	186	2.31671	6.64658	2.97792e-39	2.05596e-37	18.3901	44.9907	24.7068	34.7954	66.6954	30.7048	45.0442	18.8171	33.5234	37.6939	38.5734	56.856	25.2736	34.0833	29.3222	45.7163	23.4141	44.0648	46.7979	40.4975	18.1871	19.1322	207.76	135.567	152.595	81.0148	179.769	161.612	137.495	88.7571	111.376	167.116	216.649	214.246	160.141	403.118	195.733	169.193	56.3036	137.043	144.244	109.744	125.215	280.989
RFC1	185	1.6244	7.01893	3.49282e-33	1.49223e-31	65.3389	71.3716	50.3287	103.04	62.1016	35.711	69.7337	43.2513	37.3767	82.4807	57.9408	101.898	63.2634	64.4523	110.143	46.5356	43.3796	64.0433	66.7082	69.5236	66.0014	35.2032	149.709	152.634	176.908	161.411	172.818	239.38	193.85	191.04	199.767	217.224	215.748	231.402	195.354	191.252	195.509	297.118	91.586	215.874	201.552	144.264	204.555	201.793
CUL3	184	1.85298	6.98832	5.15659e-39	3.47667e-37	49.5451	55.4204	70.4601	55.9418	59.2092	27.5342	63.8912	30.0513	35.8354	57.7568	52.7762	82.6996	76.1386	56.3685	76.8785	46.044	68.0643	60.309	55.1364	52.1427	56.0279	58.1618	93.2255	136.954	144.027	157.494	211.823	279.632	246.812	106.539	170.191	259.329	211.915	219.804	186.946	233.482	252.054	240.054	89.3635	222.109	223.336	145.295	248.969	232.462
FAM49B	183	1.92747	6.85036	3.41734e-39	2.34061e-37	32.4531	62.169	38.1278	53.6349	71.2892	36.5453	54.6562	22.7491	48.4227	47.4214	46.966	68.4856	30.2011	52.4358	62.3406	52.2706	49.0063	65.3503	66.1977	42.757	22.8805	33.6726	110.931	118.916	108.599	181.201	196.762	80.3504	160.952	198.336	199.598	307.742	237.766	162.148	173.049	188.965	191.759	190.295	73.6207	222.356	199.341	134.217	213.105	251.485
PI4KA	182	1.55785	6.79835	2.16486e-37	1.29741e-35	56.0357	49.6943	50.0237	48.8289	55.9765	51.8977	64.4566	52.8003	57.5421	54.109	62.9441	53.164	59.1306	60.5196	36.2216	44.897	60.0781	45.3718	51.0522	51.4475	46.0543	61.9882	46.8478	217.712	191.496	92.3527	108.132	161.308	256.549	219.309	243.709	144.758	159.838	180.342	146.392	90.6418	205.258	196.976	128.906	206.491	157.046	182.649	155.971	171.668
SEPHS1	181	1.51498	7.00343	9.40496e-31	3.36783e-29	58.8483	61.76	61.9195	41.5238	91.5361	73.7582	108.182	46.6216	76.4231	58.5674	62.7827	65.532	64.6939	60.3012	31.2935	90.2856	64.9787	82.1547	79.8116	87.2521	40.4809	60.4576	222.096	210.358	200.99	156.876	128.6	180.447	104.892	186.785	192.331	225.576	280.449	159.925	269.687	293.041	186.509	149.527	110.477	166.859	194.716	135.248	173.486	227.493
EEF1B4	180	1.6573	7.09506	5.10579e-35	2.51788e-33	61.8773	69.3266	29.5872	79.395	61.0808	77.93	51.0753	55.6089	81.047	66.471	57.2952	59.2557	40.3741	44.3519	98.8086	62.2659	59.352	62.7363	60.9223	47.4499	29.9206	76.5287	236.981	149.165	324.64	357.661	134.586	156.752	139.265	220.373	215.316	174.771	119.785	147.994	185.413	210.795	180.96	179.12	211.046	170.687	162.944	290.589	251.576	288.908
RANP1	179	1.59074	6.91603	3.86731e-41	3.00675e-39	49.7614	57.2609	28.6721	59.0176	67.5461	80.0993	50.8868	47.1833	64.7349	61.2019	54.7129	61.8401	41.4868	38.8899	50.5131	77.0131	62.2561	67.4042	62.1135	50.5784	20.5338	80.3551	216.064	254.066	212.799	145.95	144.627	210.673	181.606	129.032	186.415	188.734	158.936	150.773	141.347	132.872	164.236	170.754	199.1	158.587	185.935	226.701	260.334	217.4
RP11-512H23.2	178	-2.36297	3.49203	5.64904e-43	5.02589e-41	16.8756	15.5422	25.9269	20.7619	14.6322	20.8592	14.5122	18.8171	16.9544	17.023	20.013	14.5832	30.678	23.8146	17.9876	19.9906	17.969	15.8708	17.1876	21.5523	30.8007	21.428	4.15206	4.9953	1.38933	0.824578	2.12402	1.21513	3.09806	5.92727	4.90122	5.04566	4.80942	4.07594	5.1435	4.39454	2.3998	2.37245	8.98265	2.7779	1.87678	3.6066	0.72981	2.87278
AC079789.1	177	-2.19189	3.39498	1.25308e-43	1.20156e-41	14.7121	15.3377	10.6758	20.1852	23.1392	26.0323	15.266	14.8852	21.3214	18.0363	16.4623	22.7055	10.6499	14.2014	20.4516	24.9064	18.332	20.9121	15.656	15.6428	7.62683	19.1322	5.5622	5.82785	4.6311	4.12289	3.08949	5.77186	4.72086	5.31935	4.5632	4.61069	4.95972	3.11254	3.01686	3.35843	2.84976	2.43488	3.51898	4.19772	3.41842	6.18275	8.02791	3.02806
RP11-162O12.2	176	-2.81279	3.36992	3.62606e-39	2.46401e-37	14.063	15.1332	25.0118	13.4568	14.1217	7.84306	13.1929	20.7831	18.881	12.5646	15.0097	10.7066	48.3218	33.2093	10.8418	8.02903	46.4652	9.70919	11.2315	9.73331	10.5602	53.5701	2.89861	0.971308	2.54711	1.44301	1.73784	2.73404	1.91785	2.27972	1.18305	3.08829	1.2775	1.25984	1.4837	2.32232	2.17482	3.30894	2.40772	4.07426	4.69194	2.83376	3.0235	4.89149
RP11-365F18.1	175	-2.45306	3.78737	6.68717e-32	2.58791e-30	31.804	13.9062	26.842	25.9524	16.5037	26.8667	12.6275	32.5789	31.3399	17.2257	24.0479	23.6285	32.7443	22.7222	43.8602	17.5328	26.6812	12.1365	11.742	13.7309	28.4539	28.3156	4.15206	1.38758	5.32577	7.83349	2.12402	2.12648	1.77032	2.73566	4.22519	2.78381	1.95383	4.15005	4.15436	4.50172	3.14973	3.43381	9.35307	4.01253	3.21733	8.24366	13.5536	4.89149
CTB-63M22.1	174	-2.25826	3.99793	2.21751e-32	8.85978e-31	25.9625	26.1764	30.8073	29.4127	16.5037	33.3747	25.2549	18.2554	23.248	25.3319	20.6586	24.5514	32.1085	48.9401	45.0922	16.0581	38.116	23.3394	13.9543	24.3333	25.8139	31.3768	3.8387	3.74647	2.54711	9.48265	3.08949	1.21513	3.24559	3.49557	3.54916	5.52413	2.47986	5.85453	6.47883	8.25315	5.24956	3.8084	15.8354	5.741	4.15572	13.396	3.23202	6.13377
AC004967.7	173	-2.07646	2.59856	7.85451e-38	4.87548e-36	9.51958	11.0432	13.421	10.1887	10.2085	9.5118	12.6275	11.7958	8.47718	9.72746	9.36091	9.59906	11.4446	12.235	6.89935	7.86517	11.6163	5.97489	8.67888	10.7762	16.7204	12.2446	4.15206	0.555033	0.694666	1.8553	1.73784	1.06324	1.91785	2.73566	3.21114	1.60939	1.95383	1.48216	2.32447	2.60814	2.99975	3.87084	5.9267	2.46925	2.74814	3.34899	2.18943	1.31993
BTF3P7	172	-2.01851	2.67045	7.34291e-32	2.81641e-30	10.8177	7.77112	11.2858	11.7266	7.99664	7.84306	8.48113	10.9533	11.9451	10.7407	11.2977	13.1064	11.9215	10.4872	20.6981	8.84831	12.3423	6.53503	6.80696	7.82141	12.9069	19.8975	5.87556	0.971308	1.62089	2.06145	0.965464	1.36702	1.32774	0.759906	1.69008	2.34884	1.65324	2.8161	2.27501	3.7157	1.12491	2.06028	4.0746	2.09886	1.34056	2.57614	3.33627	4.03742
AC026803.14	171	-2.03961	2.78701	2.99315e-45	3.22886e-43	12.1158	14.7242	10.6758	15.7637	11.3995	20.5255	12.8159	8.42559	11.5598	12.9699	8.87673	12.7372	8.90138	11.1426	12.5667	10.6507	9.25674	11.2029	10.0403	11.819	7.04015	12.2446	3.21197	1.80386	3.47333	2.06145	3.28258	2.12648	3.24559	2.12774	2.53511	2.74031	3.38162	1.66743	4.15436	3.14406	3.22473	3.55867	2.77814	3.7656	2.34597	3.09137	4.48312	1.087
MIR1181	170	-3.39931	2.1638	2.35775e-86	1.07091e-83	9.73593	6.3396	10.9808	7.30511	10.3786	10.3462	9.42348	8.70644	9.1194	8.10621	8.23115	8.86067	9.21928	11.5796	5.91373	10.323	8.53072	8.77562	8.67888	11.4714	5.57345	11.4793	1.64516	1.80386	1.85244	1.44301	0.386186	0.759456	1.03269	0.911888	1.18305	0.608959	0.751472	0.333486	1.23642	0.928926	0.974918	0.499463	0.463023	0.925968	0.938389	0.257614	0.417034	1.16464
AC104389.32	169	-3.40257	2.07311	3.59982e-86	1.55332e-83	8.87052	6.74861	10.0657	9.80423	7.31608	9.5118	5.84256	12.0767	7.06432	8.30887	7.58557	9.78366	10.6499	9.17626	12.0739	7.3736	7.6232	5.97489	5.44557	6.08332	12.0269	10.714	1.56682	0.693791	0.46311	0.618434	0.579279	0.455673	0.590107	0.911888	0.67603	0.956935	0.601178	0.852242	0.593481	0.786015	0.449962	0.624328	1.29646	0.740774	0.804333	1.8033	0.834069	0.465856
AC132872.1	168	-1.61716	4.61541	5.51044e-38	3.4967e-36	35.9148	37.8331	33.8575	40.3703	29.6046	35.711	45.4212	45.4982	42.5144	42.5576	40.9943	30.274	27.8168	40.4193	33.2647	38.6704	29.9483	36.036	39.8207	48.1451	38.4275	45.1519	18.8018	8.88053	11.8093	8.65807	6.75825	7.44266	12.3923	12.0065	10.3095	8.65592	18.7117	13.0059	12.8587	7.86015	19.7983	15.2336	12.7794	13.1487	14.6791	5.15229	19.3921	8.92891
AP003419.16	167	-1.94304	4.84782	2.42625e-31	8.98651e-30	37.4293	34.5611	53.9889	37.8712	39.9832	49.2277	50.3214	50.5535	41.8722	41.747	43.5767	30.274	51.5008	48.0661	43.6138	50.1405	48.2803	41.0774	45.2663	61.876	68.9348	40.5602	10.811	9.15805	9.49376	4.12289	7.33753	13.5183	16.523	14.1343	14.0276	11.0918	12.775	6.85499	11.474	8.50325	5.47454	9.42736	38.0605	14.3216	11.7299	12.6231	25.8561	13.7428
ALDOAP1	166	-1.97398	4.43361	6.86991e-32	2.64676e-30	32.4531	39.0601	19.2164	64.0158	25.3511	57.0708	29.2128	36.7917	43.4135	33.2355	35.8297	31.1969	34.6518	30.5875	61.3549	28.839	23.7771	21.659	28.9296	35.457	16.427	37.499	11.0461	11.3782	9.95687	7.83349	7.33753	12.4551	16.9656	7.59906	13.6896	10.9178	14.2028	9.22644	15.6778	7.2885	7.57436	5.80625	4.44502	6.66697	8.98172	6.44036	5.94274	4.42563
GAPDHP70	165	-2.15403	4.68365	4.61974e-41	3.55967e-39	35.4821	49.0808	26.842	51.7125	27.0525	71.255	34.4899	41.2854	53.6888	36.6806	35.5069	51.5026	41.1689	42.6041	112.607	29.1667	25.2292	30.4346	26.8875	34.588	32.5607	48.9783	8.77417	9.57432	11.8093	6.39048	12.551	14.7334	8.40903	4.71142	9.12641	8.9169	7.51472	7.18847	8.16036	13.2193	10.7991	9.30249	10.5569	7.90159	10.8585	4.37945	7.92365	13.6651
RP11-507E23.1	164	-2.24935	4.36307	9.14881e-40	6.52514e-38	28.3424	28.6305	43.3132	33.2575	20.2468	20.3586	25.0665	30.613	30.5692	35.262	36.1525	32.1199	29.8832	37.3605	69.7327	24.5787	38.6605	28.5674	23.8244	21.0309	65.7081	61.2229	12.2212	5.13406	9.72532	11.1318	4.24804	6.37943	4.4258	6.07925	7.94335	6.52456	3.83251	6.29918	6.57774	6.28812	5.32455	5.36922	6.76014	4.62984	5.5633	14.9416	10.5301	9.86062
RP1-146I3.1	163	-3.85837	4.0703	1.62144e-74	5.83042e-72	26.6116	27.6079	21.6566	37.679	15.3127	23.1954	22.0509	36.5109	29.1564	29.385	46.8046	25.2898	26.2273	32.3354	54.4556	25.5618	41.0201	26.7003	26.377	45.538	46.641	41.3255	3.52534	4.16275	2.54711	3.29831	1.73784	3.3416	3.98322	4.8634	4.73221	1.56589	0.676325	1.92681	2.81903	3.0726	0.674943	0.749194	3.24116	1.11116	0.871361	2.57614	0.938327	2.174
RP11-343B5.1	162	-2.90637	4.34648	1.16729e-35	5.96078e-34	33.5349	27.4034	26.842	55.9418	42.1951	31.2054	21.4855	38.4768	52.4044	34.4514	45.352	30.4586	31.1548	31.0245	100.78	30.1498	37.39	31.7416	20.2507	21.7261	30.8007	20.6627	3.8387	1.52634	8.10443	7.62735	2.31711	2.43026	1.6228	1.21585	1.85908	3.74075	2.17927	4.03888	4.25328	5.85938	3.07474	3.8084	8.14921	7.96333	4.15572	16.2297	3.64905	9.23948
XXbac-BPG296P20.14	161	-2.17641	4.4444	6.73261e-31	2.42093e-29	22.7172	24.3359	59.1743	35.5643	21.7781	25.031	33.7361	37.9151	30.1839	33.6408	38.5734	22.8901	52.6135	42.1671	27.8438	26.5449	49.0063	20.5387	35.7366	44.1475	74.8016	39.0296	7.28569	5.13406	7.40977	3.50446	9.07537	4.55673	5.90107	5.01538	3.04214	3.43627	4.05795	5.89158	5.4897	6.1452	7.72435	6.80518	18.0579	15.8649	10.8585	17.2602	15.743	8.5407
RP11-523O18.5	160	-2.62518	3.90591	8.03368e-42	6.54063e-40	20.3373	19.6323	19.8264	20.3774	23.6497	22.0273	26.3857	35.1066	26.716	34.4514	34.5385	28.2434	44.3479	26.8733	7.39216	28.6751	20.873	12.1365	33.6945	36.1523	38.1341	18.3669	7.44238	3.19144	7.64132	1.44301	8.68918	5.61997	3.54064	0.911888	2.02809	2.87081	2.02897	4.03888	4.4511	4.2159	4.7996	4.24543	4.81544	3.39522	5.42925	4.89467	7.08958	3.02806
AC005000.1	159	2.01843	3.79131	9.62426e-49	1.33963e-46	4.54344	5.11258	3.35525	5.76719	4.25353	5.6737	4.71174	4.7745	7.70653	6.07966	4.68046	7.56849	3.97383	4.36965	8.87059	6.55431	4.71912	5.60146	3.914	3.47618	4.10675	9.18344	22.6405	16.651	20.84	19.1714	19.6955	15.6448	15.7854	15.1981	19.6049	20.2261	20.5903	20.0462	19.8816	27.6177	21.7482	21.7266	16.9466	23.5196	27.2133	28.3376	27.1072	24.8457
CTC-259J15.1	158	2.06217	3.8739	1.17997e-45	1.30553e-43	5.1925	7.15761	3.05022	5.19047	4.59382	4.00497	4.3348	5.3362	6.29367	6.07966	4.68046	7.0147	4.13278	3.27724	6.40654	6.39045	5.08213	6.72175	4.76487	4.51903	6.16013	9.18344	29.9262	21.785	25.2395	43.2903	23.3642	19.4421	20.5062	22.3413	21.2949	18.8342	29.8334	23.0105	25.5691	24.4379	21.1482	19.042	16.2984	18.8897	21.4489	13.6536	31.0691	15.6838
RP13-228J13.8	157	2.13559	3.74308	1.69113e-43	1.60379e-41	3.67802	7.56662	3.96529	5.19047	5.78481	3.33747	5.08868	3.65109	2.69729	4.25576	3.71209	6.6455	4.60964	4.36965	3.44968	4.91573	4.17461	6.90847	5.44557	5.38808	3.22674	1.53057	29.2211	19.7037	22.2293	13.8117	7.53062	21.1129	25.0796	23.2531	24.5061	9.83034	20.5903	19.4163	14.9359	11.5759	34.5721	25.2229	10.6495	22.6554	27.4814	23.1853	31.9031	33.5416
PMS2P1	156	2.38175	4.08285	3.53659e-47	4.55534e-45	4.75979	4.29457	7.62556	3.84479	2.8924	4.17184	3.58092	5.61706	5.7799	6.48497	5.97162	4.24574	6.99394	6.77296	10.8418	5.07959	6.89718	3.92102	2.04209	2.95475	4.98677	9.94873	9.32255	25.1152	31.9546	21.2329	20.6609	39.3398	32.6034	19.9095	34.9846	26.2722	28.2554	25.5673	34.8175	30.1186	29.4725	30.2799	32.9673	24.1986	26.3419	30.9137	33.467	22.0505
RP1-290I10.4	155	1.63846	3.94072	4.42507e-34	2.04216e-32	5.62521	7.56662	5.4904	7.49735	8.67721	7.84306	8.85807	9.549	7.70653	8.71418	6.93999	8.12228	6.67603	7.64689	6.65295	8.35674	6.89718	10.0826	8.84905	7.47379	5.86679	2.29586	33.0598	11.5169	11.8093	17.3161	18.5369	16.5561	17.4082	16.414	23.323	27.7511	28.0299	28.0128	21.1675	27.1175	23.998	24.661	26.7627	25.3098	23.7949	20.0939	18.6623	24.8457
RP11-179G5.4	154	1.95637	3.90291	9.29525e-38	5.68922e-36	5.40885	6.74861	4.88036	7.11287	6.9758	3.00373	6.2195	4.7745	6.67899	6.28232	5.81022	8.67607	5.56336	5.46206	8.37778	4.91573	8.71223	6.72175	5.44557	6.77855	5.86679	6.88758	40.9722	13.7371	11.3462	12.781	19.8886	16.5561	16.6705	10.9427	17.0698	23.8364	23.7465	23.6775	18.843	21.1867	30.6724	29.0313	18.1505	33.5818	32.7766	21.8972	35.0309	28.1843
ZNF534	153	1.93654	4.17051	8.94737e-33	3.67694e-31	7.78875	7.15761	8.54062	6.53615	10.0383	8.8443	8.10419	8.98729	7.3212	8.91684	7.26278	10.1529	8.10661	6.55447	4.6817	9.17603	7.44169	4.48117	6.12627	8.16902	5.28011	12.2446	51.2349	18.5936	7.87288	12.9871	18.73	17.6194	18.8834	12.6144	26.7032	31.2309	28.8565	33.5709	27.4485	31.1905	28.8726	33.1518	27.1332	32.2237	29.7603	37.6117	42.329	33.5416
AL139316.1	152	2.06736	4.28391	7.85597e-60	1.78413e-57	5.1925	6.54411	9.76071	7.11287	8.16679	7.67619	8.85807	8.42559	7.06432	8.71418	6.6172	8.30688	6.35813	7.20992	7.39216	8.02903	7.98621	8.02876	8.33853	6.08332	5.86679	8.41815	46.7695	23.7277	17.5982	21.2329	23.3642	22.6318	29.3578	22.3413	23.323	35.2326	33.0648	30.7548	22.6017	34.7633	32.8472	30.4048	27.3184	36.1745	35.7258	29.6257	45.978	34.1628
RP13-503K1.1	151	2.07322	4.45543	7.40721e-60	1.72768e-57	9.08687	8.18013	6.71049	5.95943	10.3786	9.01118	9.23501	7.30217	8.99095	7.7009	7.90836	11.0758	6.99394	8.08385	5.17451	10.4869	8.71223	8.21547	10.3806	6.25713	3.81341	6.88758	40.1105	28.8617	44.6902	31.5401	34.9498	34.935	36.5867	38.1473	26.1962	39.4083	38.2499	38.4991	32.2458	35.5493	40.4216	44.2024	12.7794	35.0016	33.9831	31.9442	32.9457	34.7063
YWHAZP3	150	2.11962	4.0978	5.46334e-34	2.50791e-32	6.70698	6.74861	3.96529	4.80599	9.35778	4.83934	8.10419	5.61706	6.42211	7.29559	7.74696	8.49147	3.65592	5.89903	5.42092	7.53745	4.17461	9.14905	5.78592	6.77855	2.34672	10.714	36.0368	24.1439	27.092	36.0753	35.5291	28.2517	32.751	21.7333	23.323	34.4062	30.5849	34.2379	29.2784	40.2297	29.6975	28.2821	3.05595	20.0009	25.0684	19.3211	25.3348	18.0907
AC019097.7	149	1.60024	4.34131	4.90738e-30	1.69142e-28	11.2504	9.20265	13.726	10.7654	9.69806	2.5031	10.7428	5.61706	5.52301	9.72746	11.2977	19.0135	12.2394	10.7056	10.1026	5.57116	9.25674	14.0036	10.5508	9.38569	7.04015	7.65287	34.705	23.1726	35.4279	20.4083	22.785	23.9988	23.8993	29.6364	30.4214	27.2727	24.3477	30.7548	23.6403	27.046	32.2473	36.3983	21.8547	35.372	37.2004	39.415	43.6843	36.1815
RP11-367H5.5	148	1.49801	4.50828	1.26389e-35	6.41613e-34	11.2504	13.4972	8.54062	11.9189	10.889	10.8468	13.1929	7.02132	11.6882	13.1726	10.3293	14.9524	10.4909	9.83171	10.349	12.7809	10.7088	17.5512	12.9332	11.2976	8.50685	9.94873	45.986	25.3928	41.2168	25.7681	30.5087	32.8085	30.3905	21.4294	34.4775	31.1004	26.1512	32.274	26.9045	40.8728	32.7722	32.4651	18.4283	39.8166	32.8436	36.3236	53.6932	34.7063
WASH2P	147	2.52429	4.35939	1.76374e-30	6.23816e-29	4.32708	4.09007	10.3708	5.19047	3.06254	3.00373	5.65409	8.14473	4.62392	8.10621	6.29441	6.09171	9.21928	5.0251	4.6817	4.2603	6.53417	2.80073	4.5947	8.16902	11.7336	9.94873	4.62211	27.0579	26.1657	18.3469	14.6751	29.4669	26.8499	40.1231	22.985	21.2266	15.4803	21.0467	28.3387	12.469	49.4958	44.7643	66.8605	81.3617	47.9248	28.5952	55.257	55.2816
RP11-14K2.1	146	3.92482	4.19407	7.42312e-99	4.92781e-96	1.94719	2.04503	2.44018	2.8836	1.19099	2.33623	2.4501	2.80853	2.69729	2.43186	2.25953	2.39976	1.58953	1.31089	4.18889	1.31086	1.99655	2.24058	1.19122	1.21666	1.17336	1.53057	37.8386	22.6176	22.2293	64.5232	34.9498	26.2772	21.2439	29.7883	31.9424	27.7511	19.0874	28.161	32.7403	40.837	23.0981	25.9096	59.267	24.8159	26.543	60.5394	22.7284	34.1628
COX7CP1	145	4.31966	3.96583	4.3518e-132	9.389e-129	1.73083	1.84053	2.44018	1.9224	0.850707	2.16936	1.13082	2.24682	1.79819	1.01328	1.29116	1.29218	2.06639	0.87393	1.23203	0.983146	1.08903	0.746861	1.02104	0.521427	0.586679	2.29586	36.6635	25.5315	34.7333	26.5926	23.1711	31.8971	28.1776	21.8853	27.7172	29.2735	18.9371	28.5316	20.8707	33.7272	17.3235	17.169	36.5788	28.5198	22.9235	44.0521	35.3437	31.7559
NACA2	144	3.15371	3.92795	1.14795e-45	1.2866e-43	3.24531	1.84053	5.4904	2.8836	1.53127	1.33499	2.26163	1.96597	2.69729	3.24249	2.25953	3.50735	3.02011	3.49572	14.0451	1.80243	2.35956	2.05387	1.19122	2.08571	4.40009	3.06115	29.6912	14.2921	41.6799	41.2289	19.8886	15.9486	19.6211	11.7026	14.5346	27.7946	14.2028	26.79	27.8441	30.4759	24.5979	31.8407	35.2824	17.9638	23.3257	32.2018	27.003	39.2096
RP3-424M6.1	143	3.14	3.92282	7.13544e-49	1.00949e-46	3.89437	2.65854	2.7452	3.26808	1.87156	2.33623	1.50776	2.24682	2.56884	2.63452	2.74372	3.50735	3.97383	3.49572	6.40654	1.96629	1.99655	2.80073	2.55261	2.25952	4.10675	8.41815	41.9907	14.9859	27.5551	49.4747	12.551	11.0881	12.9824	11.5506	15.7177	19.0952	13.6016	24.1221	25.2229	36.5497	19.0484	19.9785	38.7087	21.4825	22.9905	52.811	36.0735	34.551
RP11-215A21.2	142	2.51094	4.19127	8.85843e-37	4.93215e-35	9.51958	3.88556	7.32053	7.30511	6.12509	8.34368	3.58092	3.08938	4.75236	4.66107	3.55069	4.98413	6.51708	4.36965	6.16013	3.1133	8.53072	3.73431	2.04209	3.47618	5.28011	11.4793	41.6773	16.096	39.5959	59.1635	24.1366	21.5685	16.3755	22.6452	26.1962	35.2761	15.4803	36.35	39.4665	49.769	17.1736	17.9807	35.1898	20.433	20.7116	55.6447	25.7519	26.6314
RP11-271B5.1	141	2.98624	4.40871	1.94888e-59	4.00448e-57	4.32708	3.27205	3.66027	6.92063	2.8924	4.00497	5.08868	5.3362	6.29367	3.44514	4.51906	5.35332	5.72231	3.93268	7.14576	2.62172	2.72257	2.80073	2.89296	2.78094	6.16013	9.94873	24.7557	18.0386	53.0261	59.7819	23.1711	25.8215	25.8172	27.0527	32.2804	29.4475	18.7868	27.42	31.9985	38.8005	28.8726	37.8343	52.8772	40.3105	30.6317	51.5229	33.9883	71.8195
AC016734.2	140	3.39399	4.47628	4.30698e-123	4.64615e-120	3.24531	3.06755	3.66027	3.07584	3.91325	3.33747	2.82704	2.24682	3.21105	2.22921	3.2279	2.76896	5.24545	4.15117	4.6817	6.06273	5.08213	5.04131	3.23331	2.78094	2.9334	3.82643	39.4838	38.9911	27.7866	25.1496	56.7693	34.935	37.3243	34.0438	47.8291	49.9781	30.9607	31.1995	33.2844	41.1586	27.9726	38.8957	57.5075	45.002	46.9194	54.6143	31.2776	39.5201
AC021224.1	139	4.10067	4.29023	2.98306e-126	3.67769e-123	1.51448	1.22702	2.44018	1.15344	1.36113	1.50186	2.26163	1.12341	1.54131	3.03983	2.09814	1.84597	1.58953	2.18482	3.44968	1.47472	3.44859	1.86715	1.87191	1.9119	2.05338	1.53057	44.8893	32.6082	64.3723	50.0931	35.5291	39.3398	39.9798	36.4755	38.8717	31.5354	25.6252	31.6441	38.5268	34.6204	36.2969	34.2756	16.7614	20.5565	27.5484	45.8554	38.2629	34.9392
FTH1P20	138	2.55024	3.31192	1.67527e-31	6.25871e-30	2.16354	2.04503	1.52511	3.46031	1.36113	2.33623	3.76939	4.21279	4.11015	2.63452	3.71209	1.47678	3.33802	1.09241	3.20327	3.44101	1.45204	1.12029	3.57366	1.56428	2.05338	3.06115	10.811	8.04798	17.8297	15.2547	33.5982	7.13888	8.2615	6.07925	7.60534	12.0052	7.58987	7.52196	10.1386	14.2554	12.5239	14.6093	34.9119	28.4581	19.9072	39.9302	17.4112	10.87
RP11-175B9.3	137	3.29465	3.45234	7.10254e-55	1.27698e-52	1.51448	0.818013	2.44018	1.73016	1.36113	1.33499	1.31929	1.68512	1.92663	1.8239	1.45256	3.13815	1.90744	2.40331	2.21765	1.31086	1.27053	1.30701	0.85087	1.73809	4.10675	1.53057	13.4746	10.9619	18.5244	26.5926	11.9718	18.3788	12.6873	19.9095	30.4214	7.74248	7.81531	8.07777	8.50656	8.1817	49.3458	20.7277	33.1525	16.6674	28.7549	30.3985	24.605	21.4294
AP000361.2	136	2.38241	3.32811	8.28458e-45	8.61397e-43	2.37989	2.45404	3.05022	2.69136	2.8924	3.00373	3.58092	3.65109	3.46794	3.6478	2.58232	3.69195	3.65592	2.62179	4.92811	2.45787	4.53762	2.05387	3.74383	2.95475	2.64006	3.82643	11.7511	10.2681	3.24177	18.553	20.854	8.65779	16.6705	11.2466	13.0136	25.8373	13.4514	16.2296	11.2761	16.0061	19.7983	18.4177	23.429	18.6428	18.5667	19.8363	14.2834	21.5847
RP11-305D15.5	135	2.09769	3.23494	5.07037e-37	2.89783e-35	5.1925	4.29457	2.44018	3.65255	3.40283	1.50186	2.4501	3.37023	2.95417	3.44514	3.87348	6.4609	2.54325	3.05875	6.65295	2.45787	3.63009	4.66788	2.89296	3.47618	3.52008	2.29586	26.8709	12.072	10.8831	13.1932	17.7645	9.72103	16.3755	14.2862	16.5627	15.7894	12.8502	15.8591	14.6886	20.5793	16.4986	17.9182	5.64888	13.2722	14.1429	7.72843	14.4919	13.6651
RP11-508N22.4	134	2.13099	3.54819	8.81038e-37	4.93215e-35	6.27427	3.47656	6.40547	2.8836	3.23269	4.50559	2.4501	6.17876	6.03678	3.24249	3.71209	4.98413	5.0865	5.24358	4.92811	2.94944	3.26709	2.98744	2.72279	1.39047	3.52008	5.35701	15.7465	21.23	37.7435	27.8295	11.5856	16.2523	17.1131	16.8699	17.5768	13.3971	7.81531	17.9341	22.1072	21.8298	12.4489	17.3563	16.1132	15.0624	18.2986	17.5178	17.8282	24.6127
RP3-468O1.2	133	1.88818	2.71827	7.25055e-34	3.27604e-32	2.8126	1.43152	2.44018	0.961199	3.23269	2.16936	1.8847	3.08938	2.95417	1.62124	3.2279	4.06114	3.65592	3.05875	3.20327	3.76873	3.08558	2.98744	1.87191	2.95475	2.34672	1.53057	9.08753	13.0433	6.94666	7.21506	5.79279	10.3286	10.917	13.6783	11.8305	13.7451	13.1508	12.2278	9.84189	11.2186	9.37421	10.3639	5.27846	8.02506	8.64658	8.75889	9.80031	6.3667
CALM2P3	132	1.94191	2.39742	9.77307e-36	5.0504e-34	2.8126	2.04503	1.52511	2.49912	2.55212	1.66874	1.8847	1.68512	2.69729	1.01328	1.77535	2.39976	2.22534	1.96634	0.985622	1.96629	1.63354	2.4273	2.89296	1.39047	1.17336	3.06115	8.69583	6.10536	10.6515	7.62735	6.75825	8.20212	6.78623	6.23123	6.92931	6.35057	6.08692	7.33669	4.69839	9.4679	8.77426	9.92682	4.16721	8.02506	9.98714	8.75889	10.1131	11.8017
HMGN1P4	131	3.42026	2.46084	4.5322e-36	2.39956e-34	0.432708	0.818013	0.915067	0.576719	0.850707	0.667495	1.50776	1.96597	1.02754	1.01328	0.96837	1.10758	0.476859	0.87393	2.21765	1.80243	0.907524	0.933576	0.510522	1.21666	1.17336	2.29586	20.0552	3.74647	8.10443	4.32903	3.86186	2.73404	6.49118	2.4317	4.73221	16.2244	7.89046	15.8221	6.03372	12.6834	13.2739	15.5458	2.77814	12.8401	11.998	4.12183	17.3069	10.5594
ZBTB43	130	-2.00967	5.67727	1.13302e-38	7.52148e-37	84.5944	75.0527	133.295	114.575	54.9557	40.3834	58.614	78.358	69.7441	77.8197	93.1249	90.0835	120.01	90.4517	139.219	50.7959	47.5542	44.625	57.0083	59.0951	203.871	65.0494	27.576	15.8184	11.3462	23.9128	15.4474	16.1005	22.129	16.414	10.1405	17.0508	28.0299	26.2342	13.5017	21.6154	24.6729	22.1637	7.68619	22.2232	19.7062	18.8059	21.1645	25.0786
PURA	129	-2.0084	5.76811	9.88458e-36	5.07761e-34	90.2196	57.0564	166.542	77.8571	68.9073	44.7221	69.9222	99.9836	60.1109	63.2285	74.8873	75.5003	150.688	126.283	78.8497	60.7912	109.992	67.4042	77.9397	97.8545	167.79	102.548	49.433	11.3782	9.49376	27.0049	22.9781	17.3156	18.5884	12.4625	17.2388	27.7076	28.3305	38.7585	23.5414	15.8275	23.773	17.6061	7.40837	10.1856	12.4001	15.7145	24.605	17.0814
ATP5I	128	-2.46051	5.8247	6.37032e-54	1.09952e-51	81.1328	73.0077	116.824	82.2786	71.9698	76.2613	88.2038	105.601	94.2766	86.5338	105.23	88.4221	121.44	96.1323	132.073	84.3867	100.372	75.6197	87.4695	89.3378	156.643	144.639	16.6866	7.21543	14.1249	7.62735	12.3579	7.89834	21.3914	13.6783	15.2107	20.2261	8.41649	9.2635	9.84189	19.5789	13.1989	21.4145	34.2637	18.7663	13.4726	14.684	25.3348	38.0449
UBL5	127	-2.4613	5.79127	1.57676e-40	1.16303e-38	66.4207	72.3942	127.194	74.589	83.7096	89.778	71.6184	121.609	90.4233	76.8064	105.714	85.0993	156.569	94.6029	98.0693	76.1938	107.814	64.7902	76.7485	93.5093	118.803	116.324	17.3917	11.1007	8.7991	24.7373	18.5369	33.7198	18.4409	7.2951	29.7453	33.4927	8.86737	12.339	18.1012	14.2554	8.17431	12.4866	15.1872	20.1861	12.8693	56.6752	10.6344	13.9757
RP4-778K6.1	126	-2.68233	5.64058	1.3164e-59	2.84014e-57	75.7239	52.7618	97.3021	101.503	63.6329	96.6198	70.2992	96.0517	110.974	93.2215	96.5142	106.143	111.426	93.9474	119.507	62.5936	86.2148	44.2515	59.3907	87.7736	94.7487	94.1303	15.1198	9.57432	16.4404	14.6363	10.427	9.41725	10.6219	25.6848	20.4499	8.48193	7.28928	10.4492	14.4908	14.577	9.14923	12.2993	32.9673	14.7538	8.98172	13.6536	7.81939	19.1001
PCGF2	125	-2.61076	6.10072	4.70966e-32	1.83911e-30	45.4344	93.458	228.462	108.615	70.949	127.992	68.226	192.946	72.0561	118.148	114.106	121.096	176.756	78.4352	274.496	103.23	89.3003	36.4095	59.0504	121.493	192.137	123.976	42.069	4.57902	24.5448	16.4916	13.5165	26.1253	40.2748	9.11888	6.08427	11.4832	32.3133	15.9332	20.2278	11.2186	20.0233	16.6071	44.8206	22.9023	14.2099	10.8198	8.13217	8.30777
AC008074.1	124	-1.71793	6.01577	2.44398e-38	1.61004e-36	108.61	96.5256	137.565	126.301	76.9039	61.9101	82.1727	78.9197	66.9184	112.271	97.8054	154.877	124.778	107.275	141.437	72.2612	94.0195	85.3289	84.9169	71.6093	148.137	95.6608	44.8109	16.096	34.5017	40.4043	21.6264	39.7955	26.8499	28.8764	25.8582	34.3192	27.3536	30.1619	26.6572	32.9054	36.4469	33.5889	9.72349	29.2606	33.1117	22.9277	32.9457	30.5912
RUNDC1	123	-1.44609	5.94163	3.47958e-32	1.37118e-30	94.114	100.82	89.6766	136.682	67.2058	117.145	88.3922	77.5154	92.7353	90.5869	83.1184	79.1922	114.128	96.1323	87.7203	76.8493	65.5232	76.3666	67.7293	98.3759	80.3751	101.783	32.4331	36.7709	55.1101	22.2636	25.8744	43.8965	34.2262	28.5725	36.5056	33.2318	26.527	29.0874	37.7849	21.1152	49.6458	44.0776	21.0213	37.0387	39.4123	32.9746	37.7416	30.3583
ST7	122	-1.84833	6.11998	4.45407e-42	3.69602e-40	126.567	123.724	86.3213	150.716	94.7687	147.183	77.2725	106.162	102.882	91.3976	109.91	95.4368	107.929	106.182	131.088	105.36	155.187	145.638	70.6222	63.0927	83.3084	142.343	14.3364	29.6943	21.7662	32.5708	46.5354	59.0856	31.8658	32.9799	30.2523	34.9716	32.8393	36.1647	32.8393	32.2981	31.4973	23.2874	23.1512	31.0508	29.4922	17.7754	25.8561	23.2152
C6orf47	121	-2.07406	5.98442	5.75182e-55	1.05613e-52	75.5076	78.1203	122.009	97.4655	78.7755	90.9461	109.878	119.082	102.24	108.015	114.752	76.6079	131.295	116.233	64.5582	98.97	129.957	70.0182	104.827	129.835	137.576	118.619	38.857	30.8043	29.176	18.7592	30.3156	23.5431	28.1776	20.8214	16.7317	14.963	12.249	22.3436	19.4365	23.902	24.148	20.7901	39.1718	39.1993	28.2857	30.3985	23.2497	20.8082
C15orf57	120	-1.83546	5.87587	1.2667e-32	5.15641e-31	103.417	77.0977	147.326	84.3932	66.5253	97.6211	82.5497	108.128	97.1023	101.733	98.6124	96.1752	126.527	116.233	96.5909	72.0974	107.995	46.1187	70.4521	70.7403	79.495	61.2229	47.0045	28.5842	24.5448	33.6016	11.5856	50.4278	35.2589	26.4447	16.9008	21.8355	17.5844	12.2649	25.0746	24.5451	20.4733	26.3467	39.7274	25.4333	31.436	35.2932	28.0456	18.7895
TRADD	119	-2.44736	5.96137	1.57447e-42	1.34531e-40	109.042	100.002	109.808	138.413	67.7163	118.814	98.3811	151.941	124.974	113.487	141.382	91.5602	130.024	132.837	87.4739	68.0009	64.6157	44.0648	74.8766	143.219	104.429	113.262	6.50229	18.7324	22.6924	8.65807	18.3438	13.2145	12.0972	31.6121	17.7458	14.0061	12.5496	18.1565	23.9865	7.53859	18.4484	17.7309	50.6547	32.3472	22.3202	30.9137	21.2687	17.6249
ANKRD37	118	-2.71654	6.11905	6.10229e-36	3.17246e-34	172.001	153.377	48.4985	224.728	39.9832	155.693	96.308	100.545	90.6802	84.3046	98.9352	126.08	133.203	121.913	356.056	50.632	79.4991	70.3917	73.8555	100.288	67.7614	211.984	11.8295	16.7897	21.7662	13.3994	14.482	54.6808	11.0645	9.11888	17.9148	8.96039	9.3934	18.2676	18.5957	6.18093	27.3727	17.9182	28.8	27.4704	18.9689	25.2462	23.2497	18.6342
RAB9A	117	-1.51907	5.59026	1.04608e-32	4.2785e-31	77.8875	67.2816	80.2209	62.6701	65.5044	59.5739	64.4566	71.8983	81.6892	77.4143	75.8557	112.604	110.155	73.4101	82.053	54.2369	74.9615	46.8655	60.2416	77.5188	63.948	53.5701	40.1888	15.5409	18.5244	22.6759	34.1774	18.075	19.4735	29.9403	17.0698	15.5719	24.3477	27.4941	20.4751	28.6895	23.773	23.3499	23.2438	32.2854	25.1354	21.6396	20.1219	47.6726
MR1	116	-1.76237	5.55786	5.72506e-34	2.61414e-32	75.7239	100.207	92.1167	78.2416	49.0007	92.7817	55.4101	81.4473	93.1206	73.9692	72.305	68.8548	102.207	66.8556	51.4987	48.5019	72.0574	67.9644	56.4978	61.007	61.8947	88.008	11.2811	27.0579	20.3769	32.9831	34.7567	31.2896	27.5875	21.5813	14.8727	22.662	24.7986	22.6029	33.8779	16.935	30.8974	17.7934	18.4283	18.5811	22.9905	14.684	12.6153	11.8017
VPS33B	115	-1.49215	5.54773	4.73241e-32	1.83967e-30	72.0459	70.3491	60.3944	89.007	66.3551	73.5913	64.8335	76.1111	77.1938	68.4975	76.5013	55.3792	76.1386	67.5111	68.7471	68.0009	68.2458	57.3216	63.9854	68.4808	59.2546	65.0494	24.5207	22.2013	30.5653	18.1407	21.6264	30.0744	24.0469	22.4932	21.464	20.3131	24.2726	27.0865	19.2387	12.8621	33.2972	31.591	50.6547	25.7419	25.2024	35.8084	28.7754	18.8672
RNF121	114	-1.56238	5.70299	2.47605e-30	8.68632e-29	89.1379	72.8032	97.9122	83.8165	80.647	76.4281	71.053	73.3026	82.9737	79.8462	86.6691	53.164	65.6476	72.5362	62.0942	93.7266	85.1257	67.7776	82.5344	67.7855	69.5215	77.2939	27.1843	35.9384	31.0284	24.3251	58.314	27.948	52.8146	24.9249	31.0974	23.7929	33.9665	29.532	19.2387	22.6872	19.4984	26.534	25.7441	24.6308	22.1862	31.429	22.8326	18.4013
ZNF526	113	-1.76298	5.40653	3.7375e-42	3.16222e-40	62.31	60.942	79.6108	75.7424	50.7021	84.4381	84.9998	93.524	62.6798	59.7833	52.6148	50.0259	64.8529	62.049	62.0942	58.4972	40.2941	70.7651	60.9223	70.3927	92.402	67.3452	43.5575	17.0673	18.9875	18.7592	14.2889	21.7204	18.8834	28.8764	16.0557	17.8338	19.8389	28.7909	18.6452	12.0403	23.998	18.0431	13.6129	14.013	18.4326	22.4125	12.4068	16.9261
PNKP	112	-1.67777	5.52857	1.6669e-30	5.91991e-29	61.8773	49.4898	93.9469	46.3298	59.8898	71.9225	100.831	74.426	70.1294	67.6869	75.0487	57.9635	74.549	82.8048	44.5994	64.2322	71.8759	48.546	74.7064	100.114	95.3354	66.5799	25.0691	20.1199	24.0817	17.11	13.9027	22.7837	12.6873	34.3478	22.647	12.7881	13.4514	17.2301	17.5571	17.6853	26.8477	23.9742	50.0991	37.9647	18.7678	24.4734	31.9031	21.0412
PEX14	111	-1.62644	5.83435	1.85407e-35	9.30269e-34	75.2912	77.0977	66.1898	73.2433	80.9873	100.291	82.9266	102.511	100.57	91.3976	101.356	86.0223	92.9876	85.6451	71.4576	92.5796	85.8517	69.6448	90.5326	106.893	69.5215	77.2939	27.1843	36.3547	47.9319	40.8166	25.1021	26.1253	43.963	30.5482	32.6185	29.23	34.2671	23.1217	27.8936	29.4041	19.4984	20.9774	38.1531	34.6929	25.6716	19.3211	27.2115	27.0973
TRIM21	110	-1.97763	5.63394	1.46126e-36	8.08375e-35	38.2947	68.5086	80.2209	86.7001	73.3309	89.2774	83.492	92.4006	105.451	96.0586	100.065	76.7925	76.9333	88.0484	38.6856	109.949	62.9821	53.9607	106.189	87.0783	64.8281	75.7634	53.5068	27.6129	13.6618	15.8731	22.0126	24.3026	18.1458	16.7179	18.4218	17.4423	9.69399	27.8275	9.00112	9.32499	16.8736	16.7944	25.0959	27.4704	35.9269	21.382	26.8987	18.6342
RP1-15D7.1	109	-3.03981	5.19892	3.78768e-46	4.30101e-44	65.3389	42.1277	88.1514	84.201	50.532	66.4157	44.8558	88.7495	66.9184	53.501	71.498	61.4709	78.046	77.3428	113.839	60.6273	70.2423	29.501	46.968	40.3237	99.4421	70.4064	6.42395	3.3302	3.47333	7.00891	1.73784	3.03782	2.80301	4.25548	2.36611	6.26358	4.50883	5.85453	7.36905	10.4326	3.29972	5.86869	27.5036	9.87699	6.70278	11.8503	13.1366	10.7923
TMEM208	108	-1.87315	5.27301	6.30284e-35	3.09054e-33	39.1601	46.2177	63.7497	51.7125	55.4661	54.2339	67.4721	57.294	53.0466	50.6638	51.0008	45.9647	67.2372	72.5362	121.971	74.7191	65.3417	44.625	62.1135	48.8403	96.5087	58.9271	14.6497	19.4262	18.5244	10.1011	12.3579	15.9486	14.3101	21.8853	13.5206	12.2662	13.5265	10.968	14.1941	15.9704	12.4489	11.3003	41.9499	16.1736	23.9289	14.1688	14.0749	21.8176
RP11-572H4.2	107	-1.80959	5.3048	3.84646e-30	1.33313e-28	89.1379	34.152	53.6839	65.746	52.7438	84.1043	53.9023	66.5621	69.7441	99.5038	76.0171	61.2863	62.7865	66.2002	74.168	42.2753	62.6191	42.9445	42.8839	46.407	48.9877	88.7732	7.36404	13.8758	18.5244	13.3994	10.427	9.26536	12.5398	8.81492	18.5908	11.4397	5.48575	16.5631	23.0963	26.5816	16.1236	17.1066	36.2084	18.5194	18.8348	25.5038	16.0558	22.9046
AC105399.1	106	-1.9878	5.16531	2.33508e-34	1.11335e-32	72.0459	35.7881	64.9697	64.5925	50.0216	61.9101	42.7826	85.3793	66.2762	50.8665	52.7762	58.8865	84.5631	51.7803	80.0817	41.9476	52.8179	31.5549	33.8646	32.5023	64.8281	93.365	20.7603	11.1007	16.9035	28.0357	11.5856	8.5059	10.1794	14.7422	13.3516	12.4402	11.4224	14.9698	13.749	16.0418	8.62427	8.366	25.6515	12.7784	9.78605	24.4734	13.4494	15.9168
Z83844.1	105	-2.24753	5.22055	4.95198e-47	6.28465e-45	72.695	79.1428	49.7186	60.5555	57.8481	89.1105	59.1794	70.4941	77.7075	56.3382	56.3269	38.2116	46.8912	59.2087	38.4392	68.4925	79.8621	61.0559	75.5573	66.5689	22.2938	79.5898	9.32255	12.4882	25.4711	10.7195	10.427	13.2145	24.3419	11.3986	15.8867	17.8338	19.8389	9.37466	12.9577	10.7184	9.07423	10.8009	7.50098	12.9018	14.0758	10.8198	23.5624	15.5285
ATP1A1OS	104	-2.72124	5.37091	9.3608e-90	4.48798e-87	67.2861	76.0752	47.8885	79.2028	69.9281	82.2687	46.552	95.49	85.0287	75.5904	82.1501	76.6079	76.1386	75.8134	102.751	78.6517	65.7047	63.6699	72.4942	65.0046	51.9211	86.4774	27.8893	8.3255	8.7991	6.18434	13.7096	15.6448	7.96645	9.7268	8.78839	8.65592	9.76914	17.4154	9.14949	9.57509	8.69927	8.99033	12.2238	10.0622	10.3223	7.72843	7.81939	10.7923
HCG4P5	103	-3.4374	8.07665	7.77462e-34	3.49453e-32	559.059	539.275	212.601	714.747	402.044	616.932	500.01	558.055	560.522	530.957	605.07	440.818	409.304	464.931	573.139	529.916	369.362	270.924	568.552	683.417	279.259	403.306	63.8478	95.1882	24.5448	79.1595	227.463	49.6684	100.908	158.82	34.9846	15.1805	2.25442	60.5092	33.7295	44.4098	28.3476	37.647	40.4682	43.3353	42.8307	14.9416	43.8929	11.8793
STAT3	102	-2.39504	8.16791	3.60555e-50	5.3648e-48	570.093	656.66	485.29	684.758	308.466	684.516	387.493	648.208	504.649	533.997	518.401	353.135	550.455	451.166	449.936	394.405	301.298	373.057	420.5	466.677	449.103	454.58	83.5113	78.6759	91.6959	125.542	145.978	123.184	123.037	85.7175	33.4635	103.219	122.866	67.3642	73.6905	92.0709	80.7682	77.167	108.718	128.216	89.4821	64.4036	131.053	18.5566
JUNB	101	-2.47999	7.84034	1.93646e-32	7.77285e-31	502.591	310.231	323.019	434.077	242.622	444.885	260.465	695.673	477.548	498.532	577.149	393.746	275.784	409.655	257.001	397.846	229.603	188.769	357.536	546.108	256.965	551.772	34.5483	24.699	55.1101	70.0891	185.562	38.4284	56.2077	59.7286	29.0693	99.5648	39.5274	19.5275	36.0045	100.181	52.5706	34.8375	156.872	140.377	92.5653	46.8858	43.2673	54.5828
NFKBIA	100	-2.29244	8.07541	5.52672e-36	2.89064e-34	565.117	291.213	641.157	390.247	307.616	354.44	308.525	577.434	565.916	504.004	575.373	571.329	390.389	389.991	274.496	461.915	283.329	230.407	431.051	400.282	837.191	552.537	77.479	75.9008	108.831	62.8741	190.776	53.01	30.8331	93.4685	61.3497	157.546	35.7701	39.9813	98.2705	35.3707	65.8444	86.3446	128.906	145.068	115.69	77.5419	124.172	73.9935
TACC1	99	-2.30011	8.43743	8.45458e-44	8.29125e-42	584.589	532.527	1103.88	358.912	621.526	356.108	477.959	499.637	577.733	538.05	494.03	578.897	649.006	666.59	596.547	525.983	529.631	723.335	528.39	497.789	887.352	616.056	220.216	71.4605	36.5857	120.388	277.474	105.412	67.5673	37.0834	55.9415	106.046	120.236	217.248	61.8209	89.9987	95.8419	134.917	46.1171	109.017	106.373	102.015	162.122	113.514
ZMAT3	98	-2.30573	7.76066	7.47537e-33	3.13167e-31	474.681	432.524	531.349	448.303	415.485	232.455	190.731	378.309	339.858	344.514	419.95	348.889	492.278	348.261	494.043	204.986	406.752	423.47	253.559	278.963	377.528	348.971	40.9722	69.1016	28.0182	75.655	180.349	92.6536	48.9789	60.0326	20.2809	75.9024	70.5632	67.4012	70.1296	238.698	54.5954	41.4554	16.2058	56.0519	31.9052	28.08	43.0588	70.6548
TRIM22	97	-2.10357	7.80085	3.14884e-40	2.28357e-38	449.8	355.631	432.522	412.931	357.467	236.126	273.092	369.602	378.262	376.331	449.001	346.674	400.403	462.746	449.936	281.18	354.842	276.339	345.794	301.559	297.446	486.722	96.5942	16.5122	71.7821	64.7294	132.655	56.5035	57.0929	75.5347	27.2102	54.0234	34.8683	112.162	65.4312	59.2726	119.915	95.772	55.0072	103.894	143.372	91.7107	182.87	100.858
TSPAN33	96	-2.83695	8.00864	2.35803e-50	3.57014e-48	547.592	406.757	415.135	497.324	340.283	442.716	333.78	417.347	549.861	387.68	556.974	452.633	467.64	353.723	631.537	355.571	496.052	287.728	405.014	398.544	394.248	871.661	44.9676	24.0052	135.46	17.7284	135.165	51.0354	36.8817	21.5813	84.5038	78.9472	81.3844	64.3628	88.7748	40.4083	32.9972	78.2908	69.1757	47.4096	22.5884	85.7856	79.2365	63.667
CAPNS1	95	-1.73068	7.81126	1.14158e-37	6.93789e-36	335.132	298.37	355.961	304.315	271.205	403.334	304.001	506.939	392.519	320.601	374.759	294.617	439.823	321.388	284.598	282.818	345.767	237.315	292.019	322.937	346.434	511.977	84.6864	105.873	159.31	80.3964	115.663	123.487	171.869	129.336	129.46	86.7331	103.177	116.794	106.728	94.7505	59.77	68.4888	173.726	94.4487	78.3554	123.397	67.8723	106.603
TMEM120B	94	-1.89498	7.6675	1.83838e-33	8.01273e-32	403.717	292.235	377.923	293.358	261.337	292.53	257.638	440.939	405.749	284.325	357.006	259.175	363.844	318.11	275.728	287.898	334.876	203.52	299.166	337.363	327.367	332.9	121.977	100.045	79.655	50.5054	196.182	111.944	117.579	138.759	55.7725	65.5501	96.9399	42.0192	90.7531	145.448	45.4462	50.5706	129.369	72.4724	44.1043	100.985	81.9472	61.3377
KIF1C	93	-1.82606	7.70642	3.69715e-33	1.56404e-31	445.257	333.545	337.965	252.218	386.221	365.453	303.059	386.734	390.978	320.398	364.43	238.5	247.013	245.793	274.988	383.099	326.709	296.504	411.481	362.913	282.779	267.085	68.3132	111.145	66.6879	40.8166	238.47	58.9337	124.07	156.389	55.0965	109.221	134.138	69.1798	112.069	162.169	70.644	66.928	89.9191	79.8184	72.8592	71.6168	47.1249	54.6605
MYO1C	92	-2.06463	7.91032	4.29108e-45	4.57186e-43	360.23	347.042	453.873	328.538	287.879	452.228	445.165	539.238	414.868	359.916	430.279	375.655	306.621	369.672	232.607	477.481	336.873	243.477	445.005	496.225	583.746	314.533	141.562	40.1011	90.075	43.2903	206.416	79.1353	102.826	84.5016	70.6451	52.4575	67.7076	67.4383	102.969	148.807	111.516	83.0981	132.147	91.2387	95.2464	109.486	82.5728	62.4247
STK10	91	-1.49796	8.0452	3.0785e-32	1.21869e-30	453.262	413.097	343.15	382.173	413.954	457.734	338.868	451.05	486.154	396.799	375.405	346.674	320.45	336.244	225.461	399.485	410.201	336.274	426.626	455.553	349.954	382.643	74.7371	155.687	263.973	128.016	148.682	162.22	188.392	151.677	131.488	143.105	179.978	137.767	186.847	113.15	140.838	168.881	112.144	129.389	107.177	120.306	148.986	98.7615
NFKBIE	90	-2.69989	7.48221	7.51792e-41	5.74156e-39	399.173	230.884	274.52	306.622	177.628	268.667	199.212	506.378	373.125	478.267	469.014	490.106	234.456	279.439	349.896	249.228	215.446	125.286	210.846	297.387	394.248	297.696	41.2856	32.4694	56.9626	27.0049	187.879	46.3268	35.849	39.6671	29.5763	46.4114	33.2151	42.9085	21.9588	75.6003	27.9726	31.8407	90.8452	69.8797	33.916	38.6422	47.9589	19.8765
GADD45B	89	-2.3552	7.29531	1.49197e-30	5.32052e-29	324.098	176.282	318.748	335.266	147.342	221.942	152.095	506.659	226.444	276.219	309.878	357.565	304.713	263.49	283.12	171.231	223.251	142.277	164.899	217.435	397.182	290.044	44.8109	18.3161	43.7639	33.6016	103.691	34.3274	32.6034	23.1012	25.8582	11.7007	38.1748	57.7301	26.4099	38.6576	67.1943	62.6201	201.322	58.7681	55.1638	51.2653	53.0676	37.0356
WDR91	88	-2.59481	7.22745	3.93506e-44	3.94879e-42	382.73	198.164	176.303	254.333	149.554	145.013	233.514	411.73	248.921	329.518	352.325	305.878	265.134	355.252	206.488	221.863	178.419	66.8441	225.14	278.616	398.062	219.637	26.6359	53.4219	34.2702	38.9613	63.9137	83.692	92.3518	32.22	69.4621	19.3127	51.025	15.3774	46.7366	22.2585	48.8959	53.4425	54.9146	58.1508	50.807	56.9328	34.6138	49.0702
PPP1R15A	87	-2.5214	7.46779	2.83972e-31	1.0473e-29	334.051	193.665	314.783	425.619	131.349	186.064	189.223	414.258	233.508	355.66	386.541	422.174	241.927	315.27	627.102	152.715	221.98	147.318	182.597	206.311	591.079	270.911	39.5621	54.2545	72.9399	135.643	34.1774	87.4893	53.2572	76.4466	37.8577	35.1456	30.4346	10.8198	43.423	46.3391	45.0712	71.3607	126.868	65.7437	62.5369	47.1434	36.3862	32.8429
IRF7	86	-3.38997	7.44525	1.61274e-35	8.13917e-34	80.9164	190.393	431.302	288.744	187.666	275.675	333.78	438.973	401.253	463.27	464.334	431.035	289.613	547.735	302.093	280.197	148.652	62.3629	296.784	355.092	480.49	291.574	28.9078	8.88053	21.7662	46.7948	50.5903	32.9604	41.6026	11.7026	6.7603	7.78597	9.61884	36.0535	20.2773	24.5451	18.0735	26.971	140.481	35.0633	43.9032	29.368	22.9369	5.43499
APOBEC3C	85	-1.83467	7.36982	1.87852e-31	6.98775e-30	254.216	190.393	387.683	275.864	190.388	288.358	209.013	420.718	271.141	237.309	276.793	180.721	350.015	301.724	219.301	143.212	344.859	174.392	188.042	219.868	386.622	341.318	66.5897	110.174	96.7901	49.6808	21.6264	56.1997	91.0241	38.4513	34.1395	66.159	82.6619	121.204	90.8025	77.744	86.4677	63.8688	11.7608	63.7683	78.9587	55.3871	89.2453	29.2713
PGPEP1	84	-2.4087	7.26379	2.7681e-34	1.2983e-32	203.156	247.858	400.494	298.933	171.503	253.815	215.798	248.836	232.223	259.196	240.801	262.128	255.915	301.069	411.251	118.797	278.065	163.189	124.567	244.723	483.717	284.687	130.202	53.5607	10.8831	52.773	43.2528	131.841	71.9931	46.0503	20.6189	23.7494	36.0707	56.0627	71.7122	12.469	32.9972	44.2649	51.766	44.0761	23.4597	55.1295	47.0206	43.4799
F11R	83	-2.03941	7.36328	4.82202e-33	2.02995e-31	443.959	243.768	384.328	357.95	171.162	309.717	137.771	233.108	305.179	207.114	244.191	182.013	430.445	241.642	407.062	166.971	190.398	106.614	193.488	225.257	278.673	352.797	79.2809	52.5894	54.1839	69.6768	38.6186	73.3634	154.018	126.296	93.4612	45.0195	53.7303	36.0906	79.7737	63.8815	63.6696	47.1992	73.8059	78.5838	63.8104	34.5203	33.05	59.0861
PML	82	-2.01	7.55236	3.00853e-44	3.05454e-42	244.913	274.443	254.999	291.051	276.65	385.979	248.214	379.713	398.941	326.883	312.622	262.128	286.275	322.043	246.159	302.154	286.414	235.075	301.889	383.075	236.725	284.687	165.612	95.3269	97.7163	118.121	103.112	67.7434	116.251	103.347	58.4766	38.9734	39.6777	65.4373	64.4421	65.8109	61.1948	67.6148	92.7898	91.7943	93.0345	65.6917	63.3892	56.6792
PSME1	81	-2.09614	7.4194	1.49193e-47	1.95082e-45	222.196	218.001	305.632	277.594	259.295	294.699	255.565	342.079	338.702	272.369	307.619	292.033	292.633	241.86	317.124	293.469	234.504	159.642	243.519	256.368	326.194	313.002	82.7279	62.0249	57.1941	85.9623	132.655	54.5289	36.2916	70.0634	88.5599	40.5828	49.2966	50.6899	49.3084	63.1313	44.2463	55.0033	138.444	86.2385	58.4482	66.9798	70.166	56.6015
RHOG	80	-1.87389	7.63159	3.07041e-41	2.43097e-39	297.27	258.288	297.397	313.158	274.268	308.049	203.736	490.65	400.997	315.332	407.684	288.156	295.494	279.221	380.943	277.083	293.312	215.283	276.873	250.111	454.97	342.848	159.815	62.9963	134.534	37.5183	123.193	68.6548	103.564	63.8321	75.7154	93.6057	62.0716	102.269	63.997	114.222	46.3461	51.4447	84.1776	70.2501	64.6148	81.4062	74.5449	72.363
FTSJD2	79	-1.44533	7.47062	1.81253e-34	8.69005e-33	306.574	268.922	231.207	266.829	260.997	306.547	253.115	275.517	348.464	285.947	268.4	215.24	262.75	288.397	177.412	273.151	227.425	205.76	283.85	260.192	188.324	270.146	115.788	107.538	87.2963	70.0891	156.598	103.742	127.758	114.138	98.1934	89.9519	38.0245	144.511	77.0536	100.145	81.8931	89.5911	69.4535	96.5476	104.027	84.7552	89.8709	89.1338
MGRN1	78	-1.65516	7.42444	4.73818e-43	4.25943e-41	243.615	222.5	220.226	238.185	225.607	303.209	287.793	326.913	250.077	298.106	273.726	209.149	247.013	257.809	200.574	253.652	240.312	239.182	275.682	361.349	290.993	266.32	80.2993	125.021	110.452	74.8305	109.097	87.6412	52.2245	123.105	97.8554	71.1612	131.883	89.1148	90.5553	73.0636	59.395	76.9797	85.0111	92.6585	56.1693	57.7056	68.4979	77.0992
EHD4	77	-2.17054	7.35417	4.34699e-34	2.01691e-32	286.669	287.736	163.797	251.45	301.661	410.509	293.447	365.39	351.161	307.428	244.352	267.112	206.798	227.222	92.402	298.221	331.791	314.615	289.296	307.99	117.336	210.454	170.156	75.762	67.3826	21.2329	88.2434	111.944	18.4409	36.1715	64.2229	49.6301	32.0879	48.3555	54.4024	83.0317	40.3466	44.5146	60.8412	65.9289	70.5802	61.5699	51.0867	32.2994
SIPA1L1	76	-2.06891	7.2812	6.49131e-47	8.11884e-45	296.405	250.312	203.755	230.111	222.205	317.561	217.494	248.555	235.691	304.591	243.061	301.817	249.874	213.457	188.747	256.765	212.905	326.938	224.8	266.797	344.087	190.556	81.1611	88.944	91.0012	21.2329	50.9765	146.119	62.1088	36.7795	73.3493	55.6762	66.6556	67.1789	70.2285	53.9492	64.7195	67.1153	27.2258	60.3114	58.5823	46.113	56.9252	37.9673
PEX26	75	-2.03201	7.44358	7.85003e-43	6.843e-41	237.124	523.119	214.431	179.552	379.245	537.333	187.15	276.078	435.034	235.283	187.218	144.355	228.416	339.522	196.139	251.194	435.067	323.764	223.609	170.333	161.337	328.308	98.6311	85.7526	45.6164	46.3825	85.5401	68.0472	101.056	78.1184	90.757	87.9946	102.351	54.4323	90.3574	60.666	59.245	57.3758	62.4155	67.4105	72.5911	41.2183	63.0764	54.4275
TNIP1	74	-2.0853	9.14391	8.19516e-33	3.41663e-31	909.336	838.463	681.725	1042.9	673.76	1084.51	753.501	1171.72	1110	892.899	1096.52	824.411	859.142	700.236	1083.2	973.806	740.721	607.572	940.382	946.39	794.364	1138.75	139.368	204.391	481.866	325.502	615.001	329.148	208.013	164.444	259.934	187.037	97.0902	184.974	264.89	336.914	158.762	153.959	180.394	206.244	159.392	138.597	183.078	153.965
RUNX3	73	-2.57058	8.87414	5.05254e-37	2.89783e-35	907.822	611.465	1056.9	818.172	739.605	754.603	667.559	1160.48	983.867	651.537	851.843	739.127	994.093	844.872	390.553	787.992	820.038	529.525	675.761	811.862	887.059	831.101	92.9122	136.816	362.152	103.485	487.173	225.255	159.919	145.75	132.164	181.687	81.3093	62.8065	155.146	203.292	76.7185	79.7892	113.441	135.623	65.0839	54.099	139.081	115.455
FBXW7	72	-1.78678	7.0404	2.21502e-36	1.19473e-34	209.863	151.946	391.344	172.631	134.922	88.7768	237.66	168.231	145.397	228.595	236.928	239.238	220.945	248.633	156.467	176.311	242.127	106.428	203.188	149.302	382.222	325.247	55.7786	28.723	40.059	46.3825	46.7285	96.299	56.5028	50.1538	63.8848	45.9764	43.2097	54.0247	55.1442	74.8857	72.4439	67.4899	24.9106	62.7806	53.4211	33.4899	79.3408	92.3948
TNRC6B	71	-1.71662	7.13012	2.68562e-46	3.17491e-44	268.063	251.335	347.115	229.15	173.884	120.983	178.481	222.716	171.342	200.629	160.911	219.117	242.086	264.801	180.615	191.386	225.247	244.97	227.863	188.93	277.499	208.923	103.802	60.9149	50.479	88.8483	66.617	82.325	68.0099	54.1053	36.8436	43.5841	69.5863	69.9579	70.8715	59.2012	93.7421	64.7428	39.82	68.3982	59.1185	47.6587	73.8151	70.0337
ZNF827	70	-2.20415	6.81235	1.77926e-36	9.78025e-35	170.054	162.58	459.974	127.07	153.127	116.478	186.208	138.18	167.874	136.995	133.958	162.63	246.218	229.188	128.624	137.968	176.786	135.555	156.05	174.852	372.541	198.209	33.0598	47.7328	50.0159	50.2993	56.9624	26.2772	46.6185	46.2023	24.8441	22.053	57.1119	10.1528	42.8295	28.7967	71.094	52.8806	15.5576	46.0515	41.8253	32.9746	69.332	42.5482
ZBTB7A	69	-1.72806	6.9458	2.08965e-45	2.28275e-43	142.361	169.124	409.95	192.047	168.44	201.917	153.226	254.453	191.25	158.882	168.012	151.185	173.418	224.6	137.248	154.518	167.529	152.733	177.832	211.178	363.741	174.485	46.4561	36.3547	28.7128	45.3518	56.3831	26.2772	41.16	44.0746	47.1531	64.9411	58.0137	60.9168	71.0199	59.5585	75.5936	60.1228	41.9499	71.4847	57.7779	54.8719	77.2556	58.6202
WIPF2	68	-1.44215	6.92604	1.10616e-31	4.18691e-30	142.361	167.897	294.652	215.693	131.689	172.881	148.891	196.035	166.975	162.53	162.525	144.909	208.388	189.206	278.684	145.014	158.272	123.606	142.606	150.519	283.073	153.057	67.4514	77.1496	55.5732	109.669	51.5558	65.3132	63.289	66.7198	60.5047	55.5023	74.6212	74.8491	65.184	64.0602	80.7682	64.4931	45.9319	58.7681	64.9499	48.9467	92.5816	49.536
C19orf66	67	-2.51403	6.84542	9.66527e-34	4.2775e-32	118.562	151.332	319.663	191.086	122.672	123.987	169.811	191.542	187.654	224.339	263.235	206.564	209.977	295.607	244.434	124.204	177.33	76.74	154.858	178.328	335.287	242.596	34.7833	10.9619	40.059	8.03964	43.639	23.2393	53.1097	59.5767	49.3502	12.3097	13.7519	31.57	8.50656	19.2216	16.8736	37.9592	58.9892	52.9654	53.3541	49.9772	38.8884	55.8251
MAFG	66	-2.01439	6.91827	6.05664e-48	8.04135e-46	213.974	144.788	209.55	188.01	111.613	117.145	168.115	274.674	183.544	216.436	245.482	190.689	200.281	253.877	289.034	144.195	166.621	90.1835	153.497	175.373	367.261	176.781	64.2395	36.3547	59.0466	45.7641	47.5008	68.1991	59.8959	66.4158	45.632	37.8859	46.6664	29.2727	66.8655	46.8036	49.7958	39.7073	55.4702	51.0517	47.6567	45.5978	35.1351	37.9673
TNFSF9	65	-2.9605	6.89891	1.17307e-31	4.4208e-30	222.196	175.055	255.914	218	130.328	175.718	146.818	303.602	202.682	264.871	274.694	243.484	223.011	221.76	297.904	119.125	140.666	113.71	167.962	207.528	314.46	226.525	14.7281	21.6463	38.9013	49.4747	86.5056	7.89834	69.3376	60.7925	13.5206	25.4893	10.2952	19.8609	14.9359	67.3829	9.82417	14.859	51.8586	15.0007	16.891	19.3211	6.67255	9.70534
TRIM56	64	-3.06396	6.77196	4.077e-71	1.35325e-68	173.083	147.651	245.848	254.91	135.092	146.515	192.239	255.857	160.424	196.576	225.307	147.862	229.21	282.498	144.64	145.833	175.697	131.821	185.49	273.402	287.766	241.831	47.9446	27.7517	10.8831	15.8731	33.5982	34.3274	20.9488	22.6452	16.3937	14.5715	44.1866	43.7237	36.6969	14.3626	15.6737	16.1701	10.2791	9.56834	14.8802	21.382	31.9031	13.4322
PISD	63	-1.591	6.82162	6.62222e-37	3.75985e-35	156.208	202.663	129.634	208.388	151.936	182.393	142.483	219.627	189.966	172.054	188.509	180.536	193.605	182.214	167.063	167.299	155.005	134.062	159.283	190.669	136.99	130.099	60.4791	48.0104	51.8684	24.9435	36.8807	70.9331	63.7316	146.966	54.7584	55.5892	58.7651	52.3202	37.9333	67.2757	49.7208	52.8182	59.1744	69.1389	58.8504	58.2209	54.2145	53.7287
SH3GL1	62	-1.43181	6.93573	1.57245e-34	7.62373e-33	195.8	176.486	186.369	249.527	141.728	221.441	145.122	210.078	236.462	179.755	193.028	149.893	195.194	178.719	195.892	146.325	137.036	123.419	160.644	232.73	156.937	169.128	67.1381	80.4798	72.7083	43.2903	51.3627	70.4775	68.1574	73.255	73.5183	47.8033	55.6089	60.0275	43.1757	142.805	55.3453	62.1831	73.0651	70.3118	63.8104	63.1155	57.9678	47.2844
RGS14	61	-1.78827	6.98242	6.0923e-34	2.76718e-32	270.875	222.909	162.882	207.234	141.217	236.46	158.88	275.798	152.589	169.825	186.895	172.968	275.784	173.475	171.745	152.224	225.429	132.568	185.49	253.414	159.283	202.036	28.046	25.254	72.4768	48.8562	53.4867	37.8209	82.7626	64.1361	97.3483	44.6715	40.1286	37.721	43.0768	49.0545	73.5688	81.5997	80.3808	74.8799	88.6107	93.7717	65.7872	43.1693
FDXR	60	-2.64666	6.79673	2.72331e-53	4.51964e-51	267.846	201.027	132.075	273.942	161.294	238.629	166.796	359.211	228.884	133.753	200.13	80.1152	248.126	182.433	204.516	102.903	283.147	146.758	142.436	233.252	89.7619	229.586	16.0599	27.8904	30.3337	8.86421	61.0173	19.1383	38.357	28.4205	21.633	32.2748	16.1567	47.6885	41.8898	44.8386	16.5736	21.7266	51.2104	34.6929	28.0176	28.5952	22.8326	15.7615
ZFAT	59	-2.83635	6.89304	1.07106e-51	1.68059e-49	219.816	220.659	183.928	246.067	228.16	278.178	196.762	153.346	278.848	257.575	217.238	257.144	171.351	182.87	171.991	208.099	153.372	144.704	200.125	187.714	163.097	203.566	24.2073	26.2253	39.1328	92.765	33.4051	79.1353	51.7819	44.5305	34.4775	32.2748	24.1223	21.7507	22.1072	20.7579	46.0461	36.1486	14.8167	19.8157	30.2965	33.2323	31.0691	25.4668
ZFAND3	58	-2.07107	7.03376	8.69911e-33	3.59203e-31	259.841	228.226	171.118	193.585	133.901	182.226	193.558	230.861	260.609	264.263	253.874	230.562	221.263	184.836	333.386	161.072	161.176	130.514	161.665	210.483	209.738	191.322	57.5021	72.1543	65.9932	88.8483	82.4507	105.261	93.6795	105.779	39.0407	37.1465	22.1684	35.9424	57.3203	55.414	36.3719	42.7041	27.1332	52.9036	56.3703	43.2792	35.865	27.9514
ZDHHC18	57	-1.86998	7.14196	4.00485e-37	2.33526e-35	217.652	253.38	196.434	279.132	189.537	293.03	202.039	229.457	263.949	227.987	240.156	198.627	169.126	228.314	261.436	212.523	169.525	181.861	217.482	230.471	207.684	196.679	28.3594	80.341	124.577	61.0188	55.8038	24.9101	71.8456	87.2373	73.5183	68.2469	50.1983	44.0201	70.8715	89.8558	47.246	48.8225	57.8779	67.8426	45.1767	63.3732	47.1249	36.725
SNX11	56	-2.23501	6.82226	3.12083e-46	3.63956e-44	248.591	169.738	270.86	186.088	201.958	221.942	116.097	200.529	278.848	176.715	192.222	127.557	178.822	177.408	153.264	188.928	218.35	144.891	157.071	128.097	175.124	215.811	45.751	35.6609	67.6141	12.9871	104.849	35.6944	29.6529	40.1231	41.0688	69.0298	25.3998	28.4204	52.0779	35.1563	21.2232	34.7751	47.6914	46.9774	36.7312	33.2323	40.8694	28.6502
RILPL2	55	-2.28925	6.8084	2.84e-37	1.67871e-35	178.925	160.944	150.376	139.374	200.086	187.9	164.345	206.708	216.04	260.007	192.706	220.225	154.502	169.761	249.116	163.53	164.806	172.525	128.992	152.083	227.045	180.608	36.4285	59.111	47.0057	42.8781	67.1963	29.1631	62.994	52.5855	12.3375	32.7533	28.6311	13.3024	26.7066	36.2281	26.6977	29.9678	116.682	57.0396	32.3744	54.3566	41.9119	29.8148
UBE2M	54	-1.42357	6.73113	2.73076e-34	1.28779e-32	118.995	141.312	119.569	137.067	159.763	196.077	163.026	173.848	164.278	161.111	159.942	132.91	146.237	152.064	133.059	196.465	148.471	149.372	169.493	211.873	119.096	150.761	53.4284	40.7949	64.6039	36.6937	55.4177	51.9468	78.1892	98.9398	71.4902	69.4213	60.7941	58.5453	63.2551	59.2369	46.3461	47.0119	100.106	54.879	50.673	55.1295	66.2042	48.2938
RFFL	53	-1.69268	6.64654	8.71969e-34	3.89901e-32	196.017	129.246	110.113	138.22	167.93	131.496	168.492	185.644	147.452	197.184	154.778	160.784	167.06	120.602	93.8804	168.282	107.632	152.546	203.188	160.6	149.31	147.7	67.2947	50.9243	39.1328	48.444	130.917	57.1111	28.9153	48.938	38.0267	33.9712	52.9788	29.3097	50.3469	57.0218	59.095	48.9473	27.874	56.8544	46.1821	36.8389	51.3995	48.5267
SSH1	52	-2.14609	6.88193	8.16977e-42	6.58926e-40	266.548	238.246	134.82	187.241	164.527	262.492	166.984	264.844	208.719	202.25	147.999	160.784	240.496	140.266	96.0981	232.022	153.553	209.308	250.837	257.064	117.629	131.629	53.5068	104.485	64.3723	35.8691	36.4946	50.1241	37.7669	74.1669	36.3366	29.7955	76.9508	42.9456	67.4095	47.4467	45.3712	36.8978	24.355	45.1255	28.7549	38.8998	27.2115	23.5257
GALNT10	51	-1.95996	6.81104	1.30179e-33	5.73186e-32	141.496	279.147	260.794	167.056	231.392	198.58	244.445	148.29	179.819	204.479	80.8589	151.739	229.846	139.392	210.43	215.637	123.605	253.373	150.774	182.326	63.3614	113.262	33.7649	69.6566	19.2191	36.6937	114.697	29.6188	33.6361	53.3454	49.8572	42.9316	84.24	59.6569	26.3604	55.5212	41.8465	47.0119	28.8926	56.4223	39.7475	31.6866	35.2394	40.6848
SLC35B2	50	-1.55294	6.61196	2.77131e-33	1.18987e-31	219.383	134.359	156.171	178.591	97.3209	146.682	102.151	178.342	139.36	189.888	165.269	124.788	146.555	193.575	288.294	93.7266	141.937	88.8765	104.487	106.545	138.163	126.272	41.5206	80.6186	45.3848	42.4658	30.1225	37.5171	33.9312	63.6802	60.6737	53.6319	35.3943	54.9511	65.6785	58.308	32.6222	33.5889	53.5255	56.3606	47.3216	48.6891	50.9824	46.8185
RINL	49	-1.65076	6.64348	2.50655e-33	1.08158e-31	176.112	163.807	140.615	184.358	111.783	168.876	120.244	230.299	167.232	152.194	184.313	110.758	175.325	184.618	148.09	103.886	189.854	132.755	96.1483	168.247	148.137	181.373	55.0736	13.0433	40.2906	16.6977	39.7771	42.0738	50.8968	46.3543	45.97	77.5988	11.4224	47.2438	62.2166	42.4805	41.0965	64.0561	33.8933	69.1389	55.9011	47.1434	39.7225	52.6417
TREX1	48	-2.27163	6.43686	5.17835e-42	4.25611e-40	90.0033	102.047	147.021	167.249	93.0673	131.163	113.459	212.325	169.158	184.214	203.196	167.061	148.303	183.525	129.856	101.1	119.43	68.5245	125.248	146.173	203.871	135.456	49.3547	58.6947	62.5199	14.0178	39.584	28.8593	28.9153	25.5329	40.8998	21.531	32.3133	27.5311	25.4208	27.1175	21.8232	18.9171	46.1171	33.0262	22.8565	40.4455	14.2834	22.2058
ANGPTL6	47	-2.85866	6.53283	3.80142e-41	2.98239e-39	130.678	140.698	179.658	215.308	69.0774	113.808	121.186	229.738	130.24	185.43	232.732	178.321	206.162	216.516	196.385	74.883	154.824	79.1673	115.038	165.466	266.939	197.444	36.9769	3.88523	30.1022	10.3072	38.8117	16.1005	46.766	15.0461	21.633	7.52499	5.26031	22.3806	8.8033	17.864	12.9739	17.0442	31.856	35.1251	32.2403	30.1409	21.6858	38.7437
HEXIM1	46	-1.71932	6.46265	1.32255e-32	5.35851e-31	145.823	111.454	200.095	102.272	138.835	74.2588	141.352	162.052	128.185	105.381	113.138	100.606	172.941	192.483	107.433	98.1508	192.758	113.336	120.143	136.962	154.883	184.434	40.1105	33.0245	38.4382	51.9484	34.5636	25.8215	40.1273	42.7067	17.2388	34.1452	40.3541	32.6075	30.4159	17.6496	49.7208	41.0808	80.103	61.1756	55.432	58.9937	54.9443	48.449
PSME2	45	-2.42999	6.36354	1.40682e-62	3.67904e-60	99.5229	122.906	166.237	99.5802	149.044	123.987	155.487	166.827	169.415	111.055	154.616	120.911	186.134	133.93	70.7183	154.026	174.608	100.079	161.495	139.916	138.163	211.984	32.2764	18.4548	13.8933	15.667	15.4474	20.961	20.2112	55.1692	23.323	19.7042	12.775	25.0856	22.5523	32.8697	19.6483	19.1044	34.3563	37.1622	23.4597	47.4011	35.4479	29.2713
TMOD1	44	-2.46653	6.29931	7.5061e-57	1.40821e-54	143.226	93.2535	152.816	104.386	223.906	160.032	81.4189	152.503	140.773	90.5869	151.873	84.9147	251.782	139.173	128.377	100.936	203.104	149.746	82.5344	83.6021	137.87	133.925	40.4239	12.7658	14.8195	22.882	13.9027	12.4551	14.4576	19.3016	25.0131	23.9669	9.99458	23.0105	19.4365	18.5428	31.7973	38.7084	25.2811	25.8654	40.8199	31.1713	38.5757	30.9794
ZDHHC12	43	-1.72584	6.25339	2.72578e-30	9.52368e-29	93.0323	108.591	113.468	113.037	104.637	155.359	117.417	153.907	123.304	99.9091	129.277	88.6067	156.251	126.938	97.8229	107.982	129.776	90.3702	114.527	126.707	117.043	116.324	29.0644	49.3979	46.5426	22.4698	46.3423	58.63	30.5381	10.9427	50.3642	23.8364	31.3364	51.0233	48.1214	38.3003	23.698	23.662	65.1937	32.2237	24.13	43.5368	16.7856	31.4453
DMWD	42	-1.72262	6.30383	4.21803e-32	1.65462e-30	120.077	120.861	174.168	71.5132	137.474	139.173	135.698	131.158	129.47	117.54	126.372	80.4844	84.722	113.174	44.1066	138.132	121.427	131.074	129.673	137.831	124.083	142.343	43.4008	42.3213	46.5426	45.1456	55.8038	55.5921	35.4064	60.9445	50.3642	20.7046	27.8796	38.2768	59.0513	21.937	38.5467	38.7708	39.0792	37.5326	29.5592	26.7919	25.1263	29.4266
ZBTB4	41	-2.55993	6.33399	6.76182e-37	3.81402e-35	181.521	205.935	104.928	144.18	110.592	171.212	180.742	136.214	174.168	170.433	138.477	121.28	121.758	145.291	71.9504	135.346	83.4922	103.627	127.631	190.321	90.0553	131.629	10.576	12.3495	6.94666	23.5005	10.0408	17.3156	46.6185	57.2969	17.5768	9.78684	34.8683	8.89296	23.4425	9.718	35.997	35.1497	35.9306	47.4713	30.4976	22.9277	43.6843	14.5192
NCL	40	1.51142	9.15022	4.82802e-31	1.75805e-29	205.32	229.862	325.154	222.421	397.28	188.567	309.279	245.185	231.453	262.236	271.628	318.615	265.611	304.565	195.892	369.499	390.961	304.533	380.339	312.161	320.914	319.89	268.396	710.026	591.392	883.742	926.46	494.254	741.47	805.957	785.378	1095.17	971.353	899.782	641.058	602.837	867.077	935.931	793.159	849.853	996.166	1016.8	1636.86	1011.45
TCF3	39	1.73134	9.30678	1.18494e-48	1.59781e-46	227.388	265.65	284.891	335.843	226.798	246.806	284.024	271.585	292.591	241.768	370.079	246.807	186.929	394.579	346.692	242.837	332.88	266.629	220.205	285.047	260.192	329.073	582.464	1428.52	1480.56	920.229	878.766	1009.77	696.179	837.417	1071.51	673.465	1086.7	792.844	1284.84	638.565	1240.4	908.46	679.903	1130.36	1010.24	861.205	944.583	1164.1
H2AFZ	38	1.48675	8.66116	7.47747e-38	4.67613e-36	162.266	182.826	138.48	205.12	284.647	183.394	249.911	180.869	222.462	225.961	260.653	256.775	205.05	221.76	148.09	208.755	236.138	224.432	217.482	214.133	118.803	183.669	543.45	764.419	672.899	219.956	463.616	1011.29	577.272	419.468	701.043	704.739	593.888	715.994	588.436	548.71	478.16	596.983	518.401	585.829	574.964	677.784	616.689	587.134
HNRNPC	37	1.29039	8.8501	3.11859e-34	1.45478e-32	237.989	227.408	290.991	250.488	285.327	269.501	230.687	267.091	269.985	253.319	268.561	316.769	246.695	288.178	368.376	285.276	285.507	288.662	245.902	190.147	258.726	297.696	482.188	602.488	566.384	715.528	569.817	407.524	648.675	487.556	710.508	744.017	562.252	668.491	600.355	728.028	720.989	775.353	668.605	641.449	731.139	662.584	759.419	699.794
RPS20	36	2.60128	8.48447	2.79681e-44	2.87339e-42	84.3781	80.9833	139.09	100.541	67.5461	73.925	60.6872	92.4006	104.552	78.4276	93.9319	112.974	118.42	112.3	194.907	64.8876	110.536	61.0559	60.7521	67.9593	144.616	166.067	108.424	328.163	538.134	1189.45	482.153	430.763	417.501	458.528	638.51	424.836	293.074	515.384	557.229	771.616	601.749	617.835	1005.59	511.073	553.314	1007.01	674.344	833.417
RPL37	35	2.40599	8.7191	2.52559e-46	3.0272e-44	179.574	148.265	156.476	134.76	90.6854	88.6099	74.634	108.971	106.864	113.487	99.7421	105.959	142.74	126.501	170.759	51.779	129.594	168.604	74.3661	80.126	232.912	162.241	339.294	662.016	634.924	1624.01	535.06	640.677	478.282	707.017	922.612	447.933	308.404	518.459	734.037	471.93	641.046	662.662	1253.13	611.694	673.897	811.485	541.728	929.849
GAS5	34	3.98535	8.57858	6.00579e-62	1.52441e-59	45.0016	32.7205	91.5067	44.9841	32.497	33.2079	27.705	54.2046	44.1841	29.1824	37.7664	39.1346	61.197	47.4107	75.8929	19.9906	41.9276	23.1527	19.7402	22.5952	92.9887	47.4478	28.9861	379.781	1339.78	1173.58	391.592	651.157	367.489	576.009	829.32	442.626	389.263	455.505	717.419	940.073	884.1	738.893	995.87	469.281	765.591	1114.18	566.228	816.801
RPL3	33	6.19375	9.52138	1.38106e-103	1.0835e-100	13.414	12.2702	23.1817	19.8007	21.0975	5.17308	13.5698	23.3108	17.0828	14.3885	20.3358	14.214	12.7163	29.4951	20.4516	12.9448	27.9517	8.96233	15.1455	7.6476	38.4275	17.6016	8.53915	1266.59	2311.15	3347.99	959.672	1108.96	1447.24	1615.71	1533.91	1068.11	572.772	1039.03	1346.51	1411.18	1062.66	1113.99	1625.49	1136.22	1300.61	2251.03	1254.96	1898.29
RPL13AP5	32	3.43027	9.69305	6.26215e-101	4.50353e-98	181.088	132.314	108.588	153.023	115.186	184.229	83.6805	115.15	152.461	141.048	114.913	127.741	117.784	107.493	192.689	90.1217	127.779	110.535	81.8537	130.357	80.6684	150.761	1215.77	896.656	2128.46	3327.17	942.486	1076	1042.42	1262.05	1546.59	1159.07	604.409	1114.18	1625.99	1496.5	1182.28	1189.1	2072.86	1273.7	1383.72	2348.67	1401.76	2163.75
EIF3C	31	5.23977	7.80441	3.35163e-129	4.82076e-126	9.08687	7.77112	4.88036	12.6878	14.2919	15.3524	10.7428	12.6384	13.2295	11.9567	8.55394	10.3374	6.51708	6.55447	6.40654	15.5665	12.1608	8.40219	15.1455	11.6452	5.86679	8.41815	11.9078	520.343	377.435	350.858	559.969	467.217	547.177	865.533	420.998	565.679	642.283	295.32	405.149	356.458	387.267	494.031	340.97	387.055	448.148	214.593	478.13	362.98
DTX1	30	3.01012	8.06217	3.76843e-31	1.37803e-29	29.4242	29.8575	27.147	84.7777	5.78481	41.2178	16.7738	27.2427	150.791	76.6037	110.717	19.1981	101.253	7.64689	23.4085	19.6629	121.064	29.8744	12.9332	65.1784	21.7071	155.353	552.303	986.155	756.954	286.129	592.988	604.678	423.55	247.426	384.661	395.171	559.246	450.391	438.137	265.28	444.413	406.5	659.808	467.614	493.86	391.059	357.815	341.24
ALDH5A1	29	2.51784	7.87668	3.22647e-43	2.931e-41	30.9386	61.76	23.1817	89.5837	65.1641	61.7432	78.4033	30.3321	88.4967	82.4807	59.5548	104.113	47.0501	67.2926	37.4536	77.9963	83.4922	117.631	88.8309	99.245	24.6405	71.1717	906.873	301.522	223.219	365.494	266.468	840.869	278.531	211.558	335.987	242.54	471.549	525.351	647.29	237.805	466.311	466.186	171.689	429.341	506.998	459.327	303.809	386.661
APLP2	28	3.11149	8.02573	1.29706e-59	2.84014e-57	98.2247	38.8556	39.3479	36.7178	46.4486	82.6025	69.3568	71.3366	46.8814	15.8071	25.6618	24.736	35.7645	31.4615	17.9876	69.6395	75.143	118.938	53.775	43.9737	19.6538	22.1933	196.009	412.528	458.711	655.127	257.393	797.428	387.553	361.564	697.494	418.703	370.551	353.05	616.527	297.614	649.07	661.164	313.374	538.481	520.336	463.964	492.622	354.982
TCP1	27	1.44666	8.0963	2.615e-34	1.23997e-32	99.3065	117.589	166.237	119.765	155.679	137.17	129.102	124.699	129.213	115.514	132.828	154.693	195.512	150.097	130.348	166.479	164.988	157.401	151.455	117.669	129.656	192.852	167.414	460.122	249.385	357.867	629.676	346.767	462.202	490.9	481.671	331.448	454.04	468.844	204.998	467.536	366.644	438.778	355.417	377.733	423.146	402.909	499.19	393.26
SNRPB	26	1.67931	7.87419	1.18177e-42	1.01987e-40	65.7716	80.1653	125.364	96.3121	106.338	116.144	103.47	128.911	118.295	98.8958	116.366	99.4979	117.148	130.652	82.2994	120.599	135.584	88.8765	117.08	85.1664	128.776	101.783	146.811	368.681	316.767	268.812	244.262	289.504	432.549	526.767	525.951	348.542	315.994	357.349	275.919	370.141	256.253	323.902	635.731	356.745	375.691	378.436	279.83	384.642
MCM7	25	2.22156	8.27819	1.33938e-58	2.62701e-56	84.3781	81.1878	91.5067	77.6648	123.352	123.987	110.82	109.252	102.368	98.4905	122.337	88.4221	104.273	103.998	46.3242	134.363	117.978	101.947	122.696	102.2	89.7619	90.3038	133.571	725.428	600.886	289.015	264.923	443.674	503.214	566.13	808.532	460.851	859.008	451.095	586.112	368.855	385.392	472.617	696.572	461.502	509.076	736.777	568.626	453.433
RBBP7	24	1.29768	8.23979	2.13032e-33	9.23852e-32	148.852	187.53	129.329	159.943	231.052	178.555	198.082	153.907	169.158	173.068	169.788	199.55	154.82	184.618	89.1987	208.755	186.95	226.112	197.742	188.757	98.5621	152.292	323.939	374.509	423.514	268.4	381.552	434.105	411.157	358.068	492.826	405.871	355.522	524.277	401.193	407.084	469.46	530.617	298.835	510.27	577.511	430.216	595.421	479.055
SSRP1	23	1.2406	8.35756	3.55136e-33	1.50977e-31	146.472	158.081	190.639	178.014	221.864	230.119	197.893	173.005	184.7	165.569	171.24	179.059	164.199	151.845	180.369	243.656	195.844	191.757	191.786	180.935	217.658	182.138	194.52	529.502	624.041	440.737	447.589	448.383	475.036	456.552	609.61	485.34	416.766	490.039	411.628	427.52	394.392	445.146	450.336	434.279	453.912	486.634	548.713	476.726
CDCA7	22	2.25003	7.48761	9.60356e-40	6.79333e-38	24.2317	80.3698	53.6839	58.4409	78.9456	54.2339	57.8602	22.7491	67.5606	79.8462	69.2385	82.8842	51.5008	74.284	31.0471	100.609	57.7185	77.6736	104.997	61.3546	35.4941	30.6115	284.377	235.612	259.342	80.8086	116.821	527.518	195.03	285.725	388.886	286.211	367.996	309.808	330.42	404.976	325.173	398.634	89.1783	273.963	303.167	258.645	355.209	399.394
E2F2	21	2.50805	7.39671	2.51062e-43	2.32974e-41	25.3134	54.8069	33.8575	32.4885	106.338	77.5962	84.4344	49.9918	40.3308	45.3948	47.9343	36.1811	37.8308	50.251	11.5811	57.0225	29.2223	89.9968	62.2837	53.5332	30.5073	20.6627	585.754	238.942	164.636	161.617	145.399	340.996	160.214	167.483	408.829	229.491	463.959	486.667	265.632	196.182	334.997	308.793	287.63	245.073	273.004	477.102	239.795	246.671
HNRNPA3	20	1.57793	7.46601	1.47053e-31	5.51767e-30	87.1907	80.9833	83.5761	95.1587	136.283	59.2401	112.893	61.7876	65.7624	95.856	86.8305	109.466	78.9997	82.5864	68.2543	105.688	114.711	134.995	122.696	87.2521	66.2948	70.4064	278.815	149.165	120.409	173.368	263.186	132.449	160.952	188.305	220.724	339.451	284.733	353.236	213.257	259.349	269.977	342.444	238.272	313.101	333.999	327.686	442.473	321.907
HMGN1	19	2.09019	7.36709	2.28114e-36	1.22275e-34	54.7376	74.2347	84.1862	46.522	90.3451	48.2265	44.2904	64.0345	76.5515	48.0293	74.8873	79.1922	69.6215	91.3257	79.5889	61.1189	85.6702	71.6987	60.7521	53.5332	58.3746	107.14	190.682	136.954	244.291	122.45	149.84	135.943	205.652	106.235	220.555	369.029	178.324	413.041	214.345	335.664	273.802	331.456	159.002	448.292	369.658	286.467	396.287	289.763
HMGN2	18	1.80389	7.55257	3.48914e-36	1.85872e-34	76.1566	70.1446	50.3287	83.432	116.717	90.7793	104.224	78.9197	82.4599	99.7064	93.7705	107.066	58.8127	88.4854	89.4452	90.941	90.9339	99.3325	79.6415	96.8116	31.094	55.8659	245.207	212.161	232.25	184.705	157.178	200.648	236.781	98.1799	361.169	255.415	175.544	366.501	268.451	241.021	334.397	364.67	269.294	386.19	508.07	355.25	418.494	433.479
HNRNPK	17	1.94472	7.99743	6.72693e-49	9.67557e-47	88.7052	84.4599	174.778	103.233	111.443	87.7755	90.0885	92.6815	88.4967	96.2613	99.258	133.648	136.382	127.812	112.854	108.638	125.057	92.4241	105.338	87.0783	124.083	121.681	252.806	337.599	237.807	313.958	436.004	245.608	224.536	239.067	281.905	464.853	423.605	383.101	359.649	327.482	512.357	476.238	403.293	626.078	612.299	501.06	520.876	498.854
HMGB1	16	2.15715	7.81764	9.95722e-42	7.95656e-40	71.8296	59.715	108.283	75.1657	101.404	40.7172	107.805	69.9324	58.6981	95.6533	80.8589	148.97	97.9151	85.4266	66.0366	70.9504	121.427	102.88	82.3642	79.7783	103.549	70.4064	404.239	247.406	191.496	297.673	190.583	148.853	239.436	171.131	276.158	655.37	441.039	253.19	290.756	382.039	379.993	435.407	375.697	413.043	464.77	423.261	699.784	510.967
LBR	15	1.6462	7.90484	7.89861e-32	3.01615e-30	116.398	127.61	100.352	92.2751	173.204	96.1192	171.696	59.5408	103.524	121.593	105.068	172.414	76.1386	99.4095	68.9935	146.489	111.988	192.317	159.283	109.152	93.8687	42.0908	462.524	242.966	282.497	344.467	442.955	317.604	359.228	315.209	447.701	406.828	478.538	461.841	453.568	478.218	436.463	392.703	162.521	261.679	359.403	288.528	339.153	332.466
IPO7	14	2.12628	7.63803	1.73218e-33	7.58818e-32	71.1805	111.045	73.2053	55.5573	123.182	53.0658	83.869	30.8938	46.3676	60.7966	50.678	96.9136	80.7482	63.1414	49.0347	88.9747	121.064	135.742	90.1923	80.995	46.9343	44.3866	478.114	264.751	87.5279	296.23	565.376	392.487	256.844	335.727	314.354	359.025	380.996	395.181	348.967	587.617	384.268	356.304	94.0863	213.467	225.548	240.612	335.4	301.409
RBBP4	13	1.28894	7.82827	3.23608e-38	2.0998e-36	108.826	131.496	168.372	118.035	157.891	141.676	120.621	105.882	131.011	126.457	110.394	156.169	138.289	121.039	98.5622	132.725	136.855	163.749	137.841	102.895	101.496	136.986	325.741	290.56	331.355	311.897	346.216	345.4	335.476	369.77	294.918	367.42	381.673	334.783	316.424	290.611	345.121	376.907	166.133	313.533	337.954	298.833	338.945	297.993
PPP2R5C	12	1.5325	7.73719	3.86304e-37	2.26789e-35	126.351	125.77	105.538	125.533	110.422	86.6074	98.3811	78.0771	97.3592	124.836	117.011	136.048	108.883	104.872	139.219	76.8493	115.8	131.634	100.233	94.2045	86.8285	97.9567	263.93	302.632	239.428	600.087	230.746	342.666	235.305	237.547	299.65	308.351	250.015	354.977	320.232	366.426	403.541	372.724	204.008	332.731	347.874	296.514	277.224	357.855
TOP2A	11	2.24314	7.91171	2.48853e-43	2.32974e-41	71.3968	60.3285	104.623	111.115	101.064	38.2141	86.3191	75.5494	54.9733	97.6799	85.2166	150.447	108.565	103.561	81.0674	46.044	121.064	101.76	66.8784	82.0379	92.6953	81.8857	245.442	323.446	401.054	540.099	270.137	580.224	348.458	204.111	398.351	382.426	477.786	567.667	494.716	591.19	471.035	442.337	97.7905	323.904	385.343	245.249	425.062	379.129
CKAP5	10	1.72995	7.90545	8.41533e-41	6.31516e-39	107.961	110.227	107.368	106.309	123.182	96.453	115.343	100.545	103.781	120.377	104.584	143.247	112.698	102.905	126.16	101.919	121.608	136.862	101.254	95.2473	92.6953	107.14	166.631	343.288	420.504	407.342	331.154	589.641	346.836	338.006	387.196	324.358	435.929	389.919	414.546	609.84	469.31	379.404	136.87	292.976	333.999	254.008	362.09	309.872
RPL30	9	2.8112	7.93916	4.06005e-42	3.40177e-40	48.247	35.5836	87.8464	55.1728	47.2993	51.0633	34.4899	77.5154	71.9276	51.0691	60.5231	67.7472	80.7482	48.0661	92.402	34.4101	46.4652	25.3933	35.7366	33.1975	96.8021	86.4774	17.235	314.426	525.167	845.399	311.845	347.527	328.1	458.984	466.461	339.843	242.124	343.379	347.582	528.059	324.123	330.207	614.617	345.51	338.222	726.73	514.099	470.049
RP11-864N7.2	8	2.66995	7.8178	3.7037e-58	7.10288e-56	88.2725	53.9889	38.1278	54.4038	43.5562	61.4095	45.0442	46.9024	60.8816	50.2585	58.9092	56.1176	40.851	51.1249	111.622	41.9476	64.2527	53.2139	41.6926	42.757	29.9206	77.2939	482.736	322.474	259.805	685.018	307.79	234.368	417.944	564.307	541.838	168.116	153.375	326.223	301.735	375.679	252.354	314.974	660.642	258.469	273.942	763.312	230.724	522.768
RP11-69L16.5	7	2.14224	7.67852	8.32313e-41	6.30076e-39	86.9743	60.124	62.5296	89.1992	67.5461	101.459	42.0287	73.3026	96.4601	58.5674	59.232	72.5467	67.714	57.6794	128.377	54.4008	73.5094	47.0523	43.3944	46.0594	49.5744	79.5898	383.165	237.415	617.558	705.839	202.748	215.23	225.864	236.331	293.566	270.639	226.719	261.305	328.887	420.411	224.531	225.133	369.77	212.108	244.584	676.496	251.055	391.707
AL593851.1	6	2.4932	8.36931	2.79551e-43	2.56651e-41	149.284	127.201	53.9889	112.652	87.9631	112.973	64.4566	72.1792	102.625	98.6932	89.7356	94.1446	73.2774	67.7296	187.761	76.3577	109.992	101.573	68.2398	86.5569	38.4275	98.722	455.865	472.056	821.095	1373.54	708.844	447.471	456.153	541.053	444.321	405.871	232.881	337.377	505.052	1331.33	460.536	481.107	329.858	342.238	313.556	531.201	429.545	690.632
EEF1A1P5	5	3.00646	8.15177	1.64244e-46	1.99637e-44	113.802	49.0808	41.483	66.3227	70.0982	92.1143	39.2017	65.7196	100.956	58.9727	56.3269	56.4868	55.4746	38.8899	70.4719	38.6704	53.1809	38.8368	40.6716	35.2832	24.0538	61.9882	420.533	347.312	737.966	1573.71	648.599	362.26	368.522	491.811	408.491	376.554	214.019	310.809	500.65	1339.48	307.774	331.456	248.829	246.616	196.257	651.765	288.275	464.769
HLA-A	4	-2.97654	10.0393	8.51476e-33	3.53281e-31	1999.76	1565.06	1474.48	2376.85	1257.69	1931.23	1582.2	2144.03	1810.39	1837.48	2556.98	1739.28	2279.23	1860.38	2940.11	1584.01	1412.47	819.493	1619.21	1866.01	2456.13	1721.13	294.326	361.743	291.296	212.329	654.199	183.636	269.532	375.394	76.2224	70.1608	3.38162	213.023	155.344	190.073	156.137	205.279	527.198	344.769	278.902	216.396	282.436	117.473
HLA-C	3	-2.23292	10.0011	2.63273e-38	1.72125e-36	1875.36	1296.96	1244.19	2303.03	1496.9	1488.01	1298.18	2108.36	2440.4	1385.15	2372.18	1935.5	971.998	2050.68	2257.07	1635.46	1315.55	874.574	1363.43	1581.49	1625.98	2123.67	301.377	338.848	270.688	714.909	586.809	278.568	375.898	240.13	317.734	191.387	166.677	558.663	364.15	212.617	268.402	371.475	742.226	429.649	421.269	436.399	263.983	155.285
MKNK2	2	-2.42317	9.96929	1.07278e-31	4.07844e-30	2013.61	2090.43	1609.91	2230.17	1053.18	1691.26	1404.66	1759.26	2333.28	1896.45	2130.25	1767.33	1025.72	1416.86	2408.37	1651.36	628.006	809.037	1516.76	2149.67	1903.19	1259.66	162.871	235.334	737.272	357.042	788.784	441.396	410.125	84.1976	516.318	396.084	391.216	235.552	568.406	311.262	271.477	213.832	445.058	156.982	179.098	183.679	193.087	202.414
HLA-B	1	-2.30129	10.6975	6.64967e-43	5.85578e-41	3323.41	2144.01	1702.94	4031.84	2395.93	2559.67	2185.12	3611.21	2881.09	2073.57	3790.69	2890.79	3163.8	2912.59	3830.62	2523.57	1970.6	1451.34	2807.19	2131.77	2447.04	3439.2	653.441	532.415	806.044	681.101	1035.94	600.881	534.342	390.896	189.964	356.719	416.466	546.954	471.372	361.888	493.683	714.294	1054.58	463.046	783.152	880.011	541.623	312.589
[truncated: 1 more columns]
